# 1 **Genomic determinants of protein abundance**

## 2 **variation in colorectal cancer cells**

3 Theodoros I. Roumeliotis<sup>1,\*,#</sup>, Steven Paul Williams<sup>1,\*</sup>, Emanuel Gonçalves<sup>2</sup>,  
4 Fatemeh Zamanzad Ghavidel<sup>2</sup>, Nanne Aben<sup>4</sup>, Magali Michaut<sup>4</sup>, Michael Schubert<sup>2</sup>,  
5 James C. Wright<sup>1</sup>, Mi Yang<sup>3</sup>, Clara Alsinet<sup>1</sup>, Rodrigo Dienstmann<sup>6,7</sup>, Justin Guinney<sup>6</sup>,  
6 Pedro Beltrao<sup>2</sup>, Alvis Brazma<sup>2</sup>, Oliver Stegle<sup>2</sup>, David J. Adams<sup>1</sup>, Lodewyk  
7 Wessels<sup>4,5,†</sup>, Julio Saez-Rodriguez<sup>2,3,†</sup>, Ultan McDermott<sup>1,†</sup>, Jyoti S. Choudhary<sup>1,†,#</sup>

8 <sup>1</sup>Wellcome Trust Sanger Institute, Wellcome Trust Genome Campus, Hinxton, Cambridgeshire CB10 1SA, UK.

9 <sup>2</sup>European Molecular Biology Laboratory, European Bioinformatics Institute, Wellcome Trust Genome Campus, Cambridge  
10 CB10 1SA, UK.

11 <sup>3</sup>RWTH Aachen University, Faculty of Medicine, Joint Research Center for Computational Biomedicine, Aachen, Germany.

12 <sup>4</sup>Computational Cancer Biology, The Netherlands Cancer Institute, Amsterdam, The Netherlands.

13 <sup>5</sup>Faculty of EEMCS, Delft University of Technology, Delft, The Netherlands.

14 <sup>6</sup>Computational Oncology, Sage Bionetworks, Fred Hutchinson Cancer Research Center, Seattle, USA.

15 <sup>7</sup>Oncology Data Science, Vall d'Hebron Institute of Oncology, Barcelona, Spain.

16

17 **\*Co-first author**

18 **†Co-senior author**

19 **#Corresponding author**

20 `jc4@sanger.ac.uk` (J.S.C.),

21 `tr6@sanger.ac.uk` (T.I.R.) (lead contact)

22

## 23 **Summary**

24 Assessing the extent to which genomic alterations compromise the integrity of the  
25 proteome is fundamental in identifying the mechanisms that shape cancer  
26 heterogeneity. We have used isobaric labelling and tribrid mass spectrometry to  
27 characterize the proteomic landscapes of 50 colorectal cancer cell lines and to  
28 decipher the relationships between genomic and proteomic variation. The robust  
29 quantification of 12,000 proteins and 27,000 phosphopeptides revealed how protein  
30 symbiosis translates to a co-variome which is subjected to a hierarchical order and  
31 exposes the collateral effects of somatic mutations on protein complexes. Targeted  
32 depletion of key chromatin modifiers confirmed the transmission of variation and the  
33 directionality as characteristics of protein interactions. Protein level variation was  
34 leveraged to build drug response predictive models towards a better understanding  
35 of pharmacoproteomic interactions in colorectal cancer. Overall, we provide a deep  
36 integrative view of the molecular structure underlying the variation of colorectal  
37 cancer cells.

38

## 39 **Keywords**

40 Proteomics, Isobaric labelling, protein complexes, co-variation networks, mutations,  
41 colorectal cancer, cell lines, drug response

42

## 43 **Highlights**

- 44 • The cancer cell functional “co-variome” is a strong attribute of the proteome.
- 45 • Mutations can have a direct impact on protein levels of chromatin modifiers.
- 46 • Transmission of genomic variation is a characteristic of protein interactions.
- 47 • Pharmacoproteomic models are strong predictors of response to DNA
- 48 damaging agents.

## 49 **Abbreviations**

50 COREAD, Colorectal Adenocarcinoma

51 IMAC, Immobilized Metal ion Affinity Chromatography

52 ROC, Receiver Operating Characteristic

53 AUC, Area Under the Curve

54 WGCNA, Weighted Correlation Network Analysis

55 CNA, Copy Number Alteration

56 SOM, Self-Organizing Map

57 QTL, Quantitative Trait Loci

58 MSI, Microsatellite Instability

59 CPS, Colorectal Proteomic Subtypes

## 60 **Introduction**

61 Tumours exhibit a high degree of molecular and cellular heterogeneity due to the  
62 impact of genomic aberrations on protein networks underlying physiological cellular  
63 activities. Modern mass spectrometry based proteomic technologies have now the  
64 capacity to perform highly reliable analytical measurements of proteins in large sizes  
65 of subjects and analytes providing a powerful tool in the quest for regulatory  
66 associations between genomic features, gene expression patterns, protein networks  
67 and phenotypic traits (Mertins et al., 2016; Zhang et al., 2014; Zhang et al., 2016).  
68 However, understanding how genomic variation leads to variable proteomic  
69 landscapes and distinct cellular phenotypes remains challenging due to the  
70 enormous diversity in the biological characteristics of proteins. Studying protein co-  
71 regulation holds the promise to overcome the challenges associated with molecular  
72 complexity and is now gaining ground in the study of molecular networks as it can  
73 efficiently predict gene functions (Stefely et al., 2016; Wang et al., 2016). Colorectal  
74 cancer cell lines are widely used as a model that approximates cancer behaviour in a  
75 variety of cellular and biochemical assays however their proteome based  
76 characteristics and the genomic factors underlying protein variation remain largely  
77 unexplored.

78 Here we leveraged the accurate quantification of a 12k total proteome obtained by  
79 the application of isobaric labelling and tribrid mass spectrometry analysis on a panel  
80 of 50 colorectal cancer cell lines, first to build *de novo* proteome-wide  
81 representations of biological functions inferred by protein co-variation, highly  
82 predictive of protein complexes and interactions, and second to rationalize the

83 impact of genomic variation in the context of the cancer cell co-variation protein  
84 interaction network. We selected to study the colorectal cancer cell lines panel as it  
85 has been extensively characterised by whole exome sequencing, gene expression,  
86 copy number and methylation arrays, and the frequency of molecular alterations is  
87 similar to that seen in clinical cohorts (Iorio et al., 2016). The cancer cell functional  
88 “co-variome” appeared to be a strong attribute of the proteome, revealing the  
89 interdependencies of protein complexes and assigning putative functions to  
90 uncharacterized gene products. Additionally, our proteomics data were  
91 complemented by protein phosphorylation measurements encompassing a total of  
92 27,000 phosphorylated sequences which demonstrated that co-variation of  
93 phosphorylation can also highlight known and novel biology. We assessed the direct  
94 effects of mutations on protein abundances and we integrated these effects with the  
95 cancer cell co-variome to uncover protein network vulnerabilities by the identification  
96 of possible collateral effects on protein complexes. Proteomic analysis of human iPS  
97 cells engineered with gene knockouts of key chromatin modifiers confirmed that  
98 genomic variation can be transferred from directly affected proteins to tightly co-  
99 regulated distant gene products through protein interactions. A significant number of  
100 drug response predictive models were uniquely attributed to protein level variation  
101 leading to a better understanding of pharmacoproteomic interactions in colorectal  
102 cancer. Our results constitute a comprehensive in-depth resource elucidating the  
103 molecular organization of colorectal cancer cells widely used in cancer research.

104

## 105 **Results**

### 106 **Proteome and phosphoproteome coverage**

107 To assess the extent of variation in protein and phosphorylation abundances within a  
108 panel of 50 colorectal cancer cell lines (COREAD) we utilized isobaric peptide  
109 labelling (TMT-10plex) and MS3 quantification (**Figure S1A**). We obtained relative  
110 quantification between the different cell lines in a log<sub>2</sub> scale for 12,306 unique  
111 proteins and 27,423 non-redundant phosphopeptides at FDR<1% (9,489 and 12,061  
112 in at least half of the samples respectively) (**Figure S1B**) (**Table S1**, **Table S2**). The  
113 average correlation between biological replicates was significantly higher than that of  
114 non-replicates (Pearson's  $r=0.74$  and  $-0.02$  respectively,  $p\text{-value}=5.1e-69$ ) which was  
115 also observed in the inter-laboratory comparison with previously published TMT data  
116 for six colorectal cancer cell lines (McAlister et al., 2014) (**Figure S1F**) confirming  
117 that subtle differences between the cell lines can be detected using our proteomics  
118 approach. Similar levels of global protein variation were observed across the cell  
119 lines with an average standard deviation of 1.7-fold denoting highly variable  
120 proteomes (**Figure S1C**). Correlation analysis between mRNA (publicly available  
121 data) and protein relative abundances across the cell lines indicated a significant, yet  
122 moderate concordance of the two molecular levels with an average Pearson  
123 correlation  $r=0.57$  for matched cell line mRNA and protein data, and  $r=-0.015$  for  
124 unrelated samples (Welch t-test,  $p\text{-value} < 2.2e-16$ ) (**Figure S1G**). Overall, highly  
125 variable mRNAs tend to correspond to highly variable proteins (Spearman's  $r=0.62$ )  
126 although with a wide distribution (**Figure S1H**). Notably, several genes including

127 *TP53* displayed high variation at the protein level despite the low variation at the  
128 mRNA level, suggesting a significant contribution of post-transcriptional regulatory  
129 mechanisms to their total protein levels.

130 To identify genomic variants at the protein level we also searched our MS/MS  
131 spectra against a customized protein database containing all amino acid  
132 substitutions encoded by 77k missense mutations (Iorio et al., 2016). We identified  
133 769 unique variant peptides mapped to 558 proteins (**Table S3**) (**Figure S1D**)  
134 including several mutated cell differentiation markers (CD44, CD46, ITGAV, ITGB1,  
135 ITGB4 and TFRC) that can be useful in targeted immunoaffinity based applications  
136 for discrimination of cancer cells as well as a range of mutated protein complexes  
137 (e.g spliceosomal, MCM, eIF3, CCT, Ksr1, Emerin). Two characteristic examples of  
138 mutant peptides for KRAS and CTNNB1 colorectal cancer genes are depicted in  
139 **Figure S1E**. Although the coverage in single amino acid variants is limited to  
140 proteins with medium to higher expression, it is concordant with the overall variant  
141 frequency and distinctly higher in hypermutated lines. Our proteogenomic search  
142 reveals the unique proteotypes of the COREAD cell lines.

143

#### 144 **The subunits of protein complexes maintain tight stoichiometry of total** 145 **abundance post-transcriptionally**

146 As a means of simplifying the complexity of protein abundance variation we  
147 examined whether protein co-variation patterns detected across the cell lines could  
148 help aggregate the thousands of single protein measurements into a much smaller

149 number of biologically meaningful clusters. The Spearman's correlation coefficients  
150 between proteins with known physical interactions in protein complexes catalogued  
151 in the CORUM database (Ruepp et al., 2010) was bimodal-like and clearly shifted to  
152 positive values with mean 0.41. The respective distribution of all pairwise protein-to-  
153 protein comparisons displayed a normal distribution with mean 0.09 (**Figure S2A, left**  
154 **panel**). Specifically, 388 partially overlapping CORUM complexes, representing the  
155 most significantly correlating set, showed a greater than 0.4 median correlation  
156 between their components (**Table S4**). In contrast, the distribution of Spearman's  
157 coefficients between CORUM pairs based on mRNA co-variation profiles was only  
158 marginally shifted towards higher correlations (**Figure S2A, right panel**). This  
159 indicates that the subunits of the complexes are tightly regulated post-  
160 transcriptionally. Indeed, comparative Receiver Operating Characteristic (ROC)  
161 curves showed that our proteomics data outperformed mRNA data in recapitulating  
162 protein complexes and STRING (Szklarczyk et al., 2015) interactions (CORUM ROC  
163 AUC: 0.77 vs 0.56, and STRING ROC AUC: 0.75 vs 0.58; for proteomics and gene  
164 expression respectively) (**Figures 1A and 1B**). The ability to also recapitulate any  
165 type of STRING interaction indicates that protein co-regulation also encompasses  
166 functional relationships beyond structural physical interactions.

167



## 168 **Weighted correlation networks reveal the interdependencies of protein** 169 **complexes and biological processes**

170 We have shown above that the co-regulation of protein abundance is a strong  
171 predictor of physical and functional associations. We therefore conducted systematic  
172 genome-wide analysis of the colorectal cancer cell protein-protein correlation  
173 network. To this end, we performed a weighted correlation network analysis  
174 (WGCNA) (Langfelder and Horvath, 2008) using 8,469 proteins quantified in at least  
175 80% of the cell lines. A total of 203 modules of co-regulated proteins ranging in size  
176 from 3 to 1,065 proteins (median = 9) were detected. A comprehensive description of  
177 the modules was devised based on enrichment analysis (**Table S5**) and the basic  
178 structure of the colorectal cancer network is depicted in **Figure 1C**. We found that  
179 approximately 60% of the modules displayed overrepresentation of protein  
180 complexes (**Figure 1D**) and that the largest modules were associated with RNA  
181 processing, plasma membrane, cytosolic ribosome, cell cycle, mitochondrial  
182 translation, mitochondrial respiratory chain, immune response and small molecule  
183 metabolic process (FDR<0.01). The full WGCNA network with weights greater than  
184 0.02 is provided in **Table S6**.

185 To identify regulators of protein modules not explained by physical protein  
186 interactions we examined whether enriched transcription factors from ENCODE and  
187 ChEA databases in a given module were indeed co-expressed at the protein level  
188 along with their transcriptional targets. We found that the “small molecule metabolic  
189 process” module was enriched for the transcription factors HNF4A and CDX2 with 66  
190 and 22 transcriptional targets respectively (Benj. Hoch. FDR=0.00027 and

191 FDR=0.00012 respectively). HNF4A (Hepatocyte nuclear factor 4-alpha) is an  
192 important regulator of metabolism, cell junctions and the differentiation of intestinal  
193 epithelial cells (Garrison et al., 2006) and has been previously associated with  
194 colorectal cancer proteomic subtypes in human tumours analyzed by the CPTAC  
195 consortium (Zhang et al., 2014). The “plasma membrane” module included 60  
196 transcriptional targets of KLF5 (Benj. Hoch. FDR=0.00174) which itself was a  
197 member of this module. KLF5 is predominantly expressed in the proliferating cells of  
198 the crypt and appears to play a growth regulatory role in the intestine (Bateman et  
199 al., 2004). Interestingly, KLF5 was significantly correlated with HNF4A  
200 (Pearson=0.79, Benj. Hoch. FDR=4.17E-10) providing a potential link between cell  
201 communication and HNF4A regulated metabolic functions. Moreover, the “plasma  
202 membrane” module was enriched for an epithelial-mesenchymal transition (EMT)  
203 gene set and was characterized by the anti-correlation between the epithelial marker  
204 CDH1 and the mesenchymal marker Vimentin (VIM). STAT1 and STAT2 are master  
205 regulators of the “immune response” module with a total of 45 targets including  
206 several interferon-induced proteins (Benj. Hoch. FDR=5.06E-17 and FDR=2.05E-21  
207 respectively). The protein correlation modules clearly serve as unique attributes by  
208 which upstream regulatory events can be identified at the protein level. This  
209 approach leverages a greater number of proteomic features and extends our  
210 knowledge about cancer associated regulators beyond the use of profiles for single  
211 transcription factors.

212 To better understand the interdependencies of protein complexes and biological  
213 processes of the colorectal cancer cells in a global way we plotted the module-to-

214 module relationships as a correlation network. The nodes denote significant terms  
215 from each module and the edges represent pairwise correlations between the  
216 eigengenes (first principal component, **Table S7**) of the modules (Pearson>0.46,  
217 Benj. Hoch. FDR<0.01) (**Figure S2B**). The topology of this network revealed a  
218 strong coordination between the cytoplasmic ribosome and the RNA processing  
219 complexes that were further linked with protein processing complexes as well as with  
220 cell division and DNA repair protein complexes. Interestingly, the MCM complex, in  
221 contrast to the GINS complex, was better correlated with the cytoplasmic ribosome  
222 rather than the cell division processes coinciding with the proposed mechanisms  
223 which couple DNA and protein syntheses (Berthon et al., 2009). The 26S  
224 proteasome complex was directly associated with the RNA spliceosome generating  
225 the hypothesis of another un-expected interplay between RNA processing and  
226 protein turnover. In fact, the mechanistic connections between transcription and the  
227 Ubiquitin-Proteasome system have been previously discussed (Muratani and  
228 Tansey, 2003). The mitochondrial functions formed a distinct cluster comprised of  
229 mitochondrial translation and cellular respiration complexes. The HNF4A-metabolic  
230 related module is linked with the mitochondrial cluster as many of the HNF4A targets  
231 are involved in mitochondrial processes. Protein processing and trafficking  
232 complexes were grouped together and were associated with actin related complexes  
233 as well as with proteins involved in antigen presentation. The immune response  
234 signature was tightly correlated with focal adhesion, caveola proteins, septin  
235 complex and key proteins of the Hippo signalling pathway such as SAV1, STK3 and  
236 YAP1 revealing novel associations. Highlighting the modules with high mean mRNA-

237 to-protein correlations on the network confirmed that the HNF4A, CDX2, KLF5,  
238 STAT1 and STAT2 modules were strongly driven by transcription, whereas nodes  
239 representing protein complexes corresponded poorly to mRNA levels (**Figure S2B**).  
240 The correlation of RNA to protein levels also appears to be modestly influenced by  
241 protein class (**Figure S3A**). Interestingly, proteins characterized by degradation that  
242 is best explained by a two-state model with two different degradation rates (non-  
243 exponentially degraded, NED) present significantly lower mRNA-to-protein  
244 correlations compared to their exponentially degraded (ED) counterparts (McShane  
245 et al., 2016) that are explained by one-state model (**Figure S3B**).

246 Examination of unannotated modules revealed correlation between tRNA  
247 methyltransferases and eukaryotic translation elongation factors (**Figure S3C**). This  
248 suggests that the maintenance of total stoichiometry is also a feature of interactions  
249 between protein complexes. We also mapped 66 uncharacterized proteins to 30  
250 modules that allowed them to be functionally annotated based on their associated  
251 module function. Some candidates for further investigation include: cell cycle  
252 (C1orf112, C14orf80, C12orf45, C9orf78, C10orf12, C1orf52), tRNA processing  
253 (C18orf21), mitochondrial translation (C6orf203, C2orf47), chaperonin-containing T-  
254 complex (C12orf29), N-terminal protein amino acid acetylation (C8orf59), protein N-  
255 linked glycosylation via asparagine (C20orf24), Oxidative phosphorylation (C8orf82),  
256 ribonuclease H2 complex (C8orf76) and BLOC-1 complex (C10orf32). Taken  
257 together, our protein correlations reveal a higher order of cellular functions in a well-  
258 organized structure shaped by the compartmental interactions between protein

259 complexes and clearly divided into transcriptionally and post-transcriptionally  
260 regulated sectors.

261

## 262 ***De novo* prediction of phosphorylation networks reveals novel** 263 **functional relationships**

264 The scale of global phosphorylation survey accomplished here offers the opportunity  
265 for the *de novo* prediction of kinase-substrate associations inferred by co-changing  
266 phosphorylation patterns that involve kinases (Ochoa et al., 2016; Petsalaki et al.,  
267 2015). Phosphorylated proteins are highly enriched for spliceosomal and cell cycle  
268 functions and cover a range of cancer related pathways (**Figure S3D**). Notably, for  
269 about 450 partially overlapping CORUM complexes more than 60% of their subunits  
270 were found to be phosphorylated. To detect differential phosphorylation we  
271 regressed protein abundances from the respective phosphorylation profiles as the  
272 two levels of information are strongly correlated (**Figure S3E**). Pairwise correlation  
273 analysis among 213 variable phosphopeptides belonging to 144 kinases, and the  
274 787 most variable phosphopeptides from other protein types (**Table S8**) revealed a  
275 strong enrichment of nucleosome assembly proteins (mainly histones) (FDR=5.09E-  
276 08) correlating with three kinases, namely CSNK1A1, CDK13 and VRK3 (**Figure**  
277 **S4A**). CSNK1A1 is a casein kinase that participates in Wnt signalling where it is  
278 essential for  $\beta$ -Catenin phosphorylation and degradation (Liu et al., 2002). CSNK1A1  
279 has also been implicated in the segregation of chromosomes during mitosis and may  
280 be cell cycle-regulated (Brockman et al., 1992). VRK3 has recently been shown to

281 be an active kinase as well as a signalling scaffold in cells, with a specific role in  
282 DNA replication and chromatin dissociation during interphase (Park et al., 2015).  
283 Interestingly, VRK3 phosphorylation status was strongly correlated with the  
284 phosphorylation of 7 histones of which H2AFX presented the strongest correlation in  
285 spite of poor correlation of their respective protein abundance profiles (**Figure S4B,**  
286 **top panel**). Strongly maintained co-phosphorylation was also observed between  
287 RAF1, MAPK1, MAPK3 and RPS6KA3 of the MAPK pathway (**Figure S4C, left**  
288 **panel**) as well as between CDK1 and CDK7 of the cell cycle pathway (**Figure S4C,**  
289 **right panel**). The correlation plots of MAPK1 and MAPK3 phosphorylation and total  
290 protein are depicted in **Figure S4B, bottom panel**. Overall, these examples  
291 demonstrate that functional relationships are encrypted in the patterns of co-  
292 regulated phosphorylation events.

293

## 294 **Protein abundance and phosphorylation variation are associated with** 295 **genomic alterations**

296 Assessing the impact of non-synonymous protein coding variants and copy number  
297 alterations on protein abundance is fundamental in understanding the link between  
298 cancer genotypes and the dysregulated biological processes. To investigate this, we  
299 first examined whether driver mutations in any of the 17 colorectal cancer driver  
300 genes (Iorio et al., 2016) with at least 5 occurrences across the cell lines could alter  
301 the levels of their protein products. Strikingly, for 7 such genes (*PTEN*, *B2M*, *CD58*,  
302 *PIK3R1*, *ARID1A*, *BMP2* and *MSH6*) we found that driver mutations had a  
303 significant negative impact on the respective protein abundances, in line with their

304 function as tumour suppressors, whereas missense mutations in *TP53* were  
305 associated with elevated protein levels (ANOVA test, permutation-based FDR<0.05)  
306 (**Figure 2A**). Protein abundance variation of APC could not be systematically  
307 attributed to genomic variants although it is possible that extreme protein changes in  
308 individual cell lines could be the result of specific mutations. For example, the low  
309 relative abundance of APC protein in 5 out of 7 cell lines with  $\log_2\text{Ratio}<-0.8$  could be  
310 explained by the presence of frameshift and nonsense mutations in these particular  
311 cell lines. Distinctly, for the majority of driver mutations in oncogenes, there was no  
312 clear relationship between the presence of mutations and protein expression. From  
313 these observations we conclude, that mutations in canonical tumour suppressor  
314 genes predicted to cause premature stop codons and ultimately nonsense-mediated  
315 decay of transcript were significantly associated with decreased protein abundance  
316 compared to driver mutations in oncogenes ( $\text{Log}_2$  mean protein abundance  $-0.65$  vs  
317  $+0.45$  respectively) (**Figure 2B**), suggesting that these have distinct regulation or  
318 gain new function upon mutation.

319 We extended our analysis to globally assess the effect of mutations on the protein  
320 abundances. For 5,498 genes harbouring any type of non-synonymous protein  
321 coding variants in at least three cell lines, 626 proteins exhibited lower (N=566) or  
322 higher (N=60) abundances in the mutated versus the wild-type cell lines at ANOVA  
323  $p\text{-value}<0.05$  (all 77 proteins with FDR < 0.1 were associated with decreased levels  
324 of expression) (**Figure 3A**). This high confidence subset was enriched for  
325 phosphatidylinositol signalling proteins (KEGG FDR=0.0307: PTEN, PIK3R1,  
326 PIK3C2A, MTM1 and PIK3C2B) and included 5 tumour suppressors (MLH1, MSH2,

327 NF1, PIK3R1, PTEN). Restricting the analysis to frameshift mutations only (the  
328 second most frequent mutation type), we found that 136 of the 389 genes presented  
329 lower abundances in the mutated cell lines with ANOVA p-value<0.05 of which 121  
330 passed the 10% FDR cut-off (**Figure 3B**). Notably, the significantly affected proteins  
331 were strongly enriched for chromatin modification proteins (FDR=2.66E-10, N=23)  
332 and included 10 oncogenes and 4 tumour suppressors. The STRING network of the  
333 most significant hits is depicted in **Figure 3E**. A less pronounced impact of frameshift  
334 mutations was found at the mRNA level where only 15% of the 349 genes (with both  
335 mRNA and protein data) exhibited altered mRNAs abundances in the mutated  
336 samples at ANOVA p-value<0.05, only 19 of these were below the 10% FDR (**Figure**  
337 **3C**). The overlap between the different analyses is depicted in **Figure 3D**.  
338 Considering all proteins negatively affected by mutations we found  
339 overrepresentation of proteins with certain domains (e.g. helicase) as well as  
340 enrichment of certain classes of enzymes such as kinases, transferases and  
341 hydrolases (**Figure 3F**) highlighting the protein classes that are subject to protein  
342 abundance reduction upon structural changes. Notably, 59 out of the 677 genes  
343 affected by genomic variants at p-value<0.05 are currently catalogued in the  
344 COSMIC Census list of genes for which mutations have been causally implicated in  
345 cancer.

346 We also explored the effect of 20 recurrent copy number alterations (CNAs) using  
347 binary-type data on the protein abundances of 212 falling within these intervals.  
348 Amplified genes tended to display increased protein levels whereas gene losses had  
349 an overall negative impact on protein abundances although with several exceptions



350 **(Figure 3G, top panel)**. The 51 significant genes with ANOVA p-value  $<0.05$  (31  
351 genes at  $FDR < 0.1$ ) were mapped to 13 genomic loci. The 13q33.2 amplification  
352 encompasses the highest number of affected proteins **(Figure 3G, bar plot)**. Losses  
353 in 18q21.2, 5q21.1 and 17p12 loci are associated with reduced protein levels of  
354 three important colorectal cancer drivers, SMAD4, APC and MAP2K4 respectively  
355 ( $FDR < 0.1$ ). Increased levels of CDX2 and HNF4A were modestly associated with  
356 13q12.13 and 20q13.12 amplifications ( $p\text{-value} < 0.1$ ,  $FDR < 30\%$ ). Global correlation  
357 using normalized log<sub>2</sub> copy number ratios obtained from the Cancer Cell Line  
358 Encyclopaedia showed median CNA to mRNA and protein correlations 0.35 and  
359 0.23 respectively **(Figure 3H)**. To summarize the possible levels of regulation we  
360 trained a Self-Organizing Map (SOM) using the Pearson correlations coefficients  
361 between CNA and mRNA, CNA and protein, mRNA and protein (three vectors) for  
362 each protein, which indicated three main regulatory routes: good concordance  
363 between the three levels **(Figure 3I, left side cluster)**, CNAs corresponding to  
364 mRNAs but buffered at the protein level **(Figure 3I, top-middle cluster)** and  
365 proteins well corresponding to mRNA irrespective of CNAs **(Figure 3I, bottom right**  
366 **cluster)**. Taken together, our results show that copy number alterations more often  
367 affect the mRNA levels than the protein levels, which needs to be taken under  
368 consideration when gene expression data are used as a proxy of the protein levels  
369 for the identification of actionable pathways. A summary of all proteins affected by  
370 mutations and recurrent CNAs is in **Table S9**.

371 Next we assessed the direct impact of mutations on net protein phosphorylation. We  
372 found 72 differentially phosphorylated proteins in the mutated cell lines (Welch's t-

373 test, FDR<10%) with both positive and negative effects (**Figure S5A**). The SRC  
374 kinase and the RUNX1 transcription factor were among the top over-phosphorylated  
375 proteins while APC was among the top hypo-phosphorylated proteins. We then  
376 focused on eight colorectal cancer genes (*APC*, *TP53*, *KRAS*, *BRAF*, *PIK3CA*,  
377 *PTEN*, *RNF43* and *PIK3R1*) to individually assess the extended effects of driver  
378 mutations on the phosphorylation status of the colorectal cancer pathway. We found  
379 that *APC* mutations were associated with decreased phosphorylation of APC and  
380 increased phosphorylation of AXIN1, and that *PTEN* mutations were related to  
381 increased TP53 phosphorylation at 10% FDR (ANOVA test) (**Figure S5B**). Mutations  
382 in *PIK3CA* were associated with increased inactivating phosphorylation of BAD,  
383 while *BRAF* V600E mutants exhibited increased AKT1 and decreased ARAF  
384 phosphorylation (**Figure S5B**). As expected, for all the associations the respective  
385 total protein levels were undifferentiated (**Figure S5C**). These observations indicate  
386 a sophisticated level of cross talk between cancer genes.

387 Overall, we show that not all driver mutations have the same effect on protein  
388 abundance. We identify key mutations that significantly impact abundance levels of  
389 proteins, which converge in certain protein classes. We conclude that for only a  
390 small portion of the proteome the variation in abundance can be directly explained by  
391 mutations and that driver mutations also alter the phosphorylation status of colorectal  
392 cancer proteins.

393

## 394 **The consequences of genomic alterations extend to protein complexes**

395 As tightly controlled maintenance of protein abundance appears to be pivotal for  
396 protein complexes and interactions, we hypothesize that genomic variation can be  
397 transferred from directly affected genes to distant gene protein products through  
398 protein interactions there by explaining another layer of protein variation. We  
399 retrieved strongly co-regulated interactors of the affected proteins and constructed  
400 mutation-vulnerable protein networks, comprised of 1,108 total protein nodes  
401 (**Figure 4A**) encompassing at least 25 protein complexes. One characteristic  
402 example was the BAF complex characterized by disruption of ARID1A protein  
403 abundance. Driver mutations in ARID1A were also significantly associated with  
404 decreased levels of the respective module (p-value = 0.01707) (**Figure 4B**)  
405 indicating a central role of ARID1A in the regulation of the profile of the complex. The  
406 WGCNA networks also revealed a correlation between the BAF complex and the  
407 functionally related PBAF complex containing the ARID2 and PBRM1 proteins which  
408 were however mapped to different modules (**Figure 4C**). We noticed that the  
409 PBRM1 sub-network displayed unusually poor overlap with STRING interactions,  
410 and the correlations were attributed to the effects of co-occurring mutations on the  
411 protein abundances, specifically in the hypermutated HT-115 cell line (**Figure S6A**).  
412 This indicates that in addition to functional relationships, protein co-regulation can  
413 also classify the effect of co-occurring genomic variants. These events are infrequent  
414 and observed on small modules, which lack functional connection between their  
415 components. To confirm whether the down-regulation of ARID1A, ARID2 and

416 PBRM1 can indeed affect the abundance levels of their interactors we performed  
417 proteomic analysis on the respective CRISPR-Cas9 knockout (KO) clones derived  
418 from human iPS cells (**Table S10**). Down-regulation of ARID1A coincided with  
419 diminished levels of 8 partners in the predicted interactome that were closer to the  
420 core of the network and were known components of the BAF complex whilst more  
421 distant interactors were not affected (**Figure 4D**). This provides an indication that the  
422 topology of the correlation network can predict the relative strengths of interactions.  
423 Reduced levels of ARID2 resulted in the down-regulation of all three direct  
424 interactors (BRD7, PHF10 and SCAF11) and the significant loss of PBRM1 protein.  
425 Four components of the BAF complex were also weakly compromised in the ARID2  
426 KO reflecting the overlap between the BAF and PBAF complexes. On the other  
427 hand, loss of PBRM1 had no effect on ARID2 or any of its interactors demonstrating  
428 that collateral effects transmitted through protein interactions can be directional.  
429 Distinctly, loss of PBRM1 had no impact on the abundance of the constituents of its  
430 module confirming that the co-variation here is due to co-occurring genomic variation  
431 rather than direct interactions. Pathway enrichment analysis on the changing  
432 proteins detected in the KO cell lines, revealed the differential regulation of a number  
433 of biological processes reflecting the modulation of a wide range of target genes  
434 (**Figure 4E**). Notably, down-regulation of ARID2 specifically activated the MAPK  
435 pathway, actin cytoskeleton, ubiquitin proteolysis and immune related signalling  
436 pathways that were not affected by ARID1A and PBRM1 depletion.

437 The above examples confirm that the loss of a subunit in a protein complex can  
438 diminish the protein abundance of its partners but not always to the same degree

439 and with subsequent changes in the total stoichiometry. We devised linear models to  
440 detect specific mutations that cause severe deviations from strongly correlating  
441 protein profiles across the cell lines, thus significantly compromising the  
442 maintenance of stoichiometry between the interacting partners. We detected 50 such  
443 mutations (p-value<0.05); mostly frameshift or nonsense alterations but also several  
444 single amino acid substitutions (**Table S11**). Two examples are provided in **Figure**  
445 **S6B**. The outlier points in the correlation plots of PIK3R1-PIK3CB and SEC31A-  
446 SEC13 involved in the PI3K pathway and protein processing in endoplasmic  
447 reticulum respectively could be explained by a truncating mutation in PIK3R1 and a  
448 missense mutation in SEC31A that significantly disrupted the total abundance  
449 stoichiometry impairing their co-functionality in the associated biological processes.  
450 This analysis highlights a subset of specific mutations with the highest impact on  
451 protein abundance and reveals their cell line-specific consequences on protein  
452 interactions. Overall, our findings indicate that an additional layer of protein variation  
453 can be potentially explained by the collateral effects of mutations on tightly co-  
454 regulated partners.

455

### 456 **Protein quantitative trait loci analysis of colorectal cancer drivers**

457 We performed Quantitative Trait Loci (QTL) analysis to systematically interrogate the  
458 distant effects of colorectal cancer driver genomic alterations on protein abundance  
459 (pQTL) and gene expression (eQTL). We identified 86 proteins and 196 mRNAs with  
460 at least one pQTL (**Table S12**) and eQTL respectively at 10% FDR (**Figure 5A**,

461 **Figure S6C**). To assess the replication rates between independently tested QTL for  
462 each phenotype pair we also performed the mapping using 6,456 commonly  
463 quantified genes and we found that 64% of the pQTLs (N=74) validated as eQTLs  
464 and 54% of the eQTLs (N=86) validated as pQTLs (**Figure 5B**). Ranking the pQTLs  
465 (FDR<30%) by the number of associations showed that mutations in *BMP2R2*,  
466 *RNF43* and *ARID1A*, as well as CNAs of regions 18q22.1, 13q12.13, 16q23.1,  
467 9p21.3, 13q33.2 and 18q21.2 loci accounted for 62% of the total variant-protein pairs  
468 (**Figure 5C**). The above-mentioned genomic events were also among the top 10  
469 eQTL hotspots (**Figure S6D**). High frequency hotspots in chromosomes 13, 16 and  
470 18 associated with CNAs have been previously identified in colorectal cancer tissues  
471 (Zhang et al., 2014). Enrichment analysis of the gene sets associated with each  
472 pQTLs showed overrepresentation of 12 distinct protein complexes and 36 partially  
473 redundant GO terms (Fisher's test, Benj. Hoch. FDR<0.1). Interestingly, increased  
474 levels of the mediator complex were associated with *FBXW7* mutations (**Figure S6E**,  
475 **first panel**), an ubiquitin ligase that targets *MED13/13L* for degradation (Davis et al.,  
476 2013) and *TP53* mutant cell lines were associated with up-regulation of cell division  
477 related proteins (**Figure S6E, second panel**). Examination of the pQTL for other  
478 functional relationships showed that driver mutations in *RNF43*, an E3 ubiquitin-  
479 protein ligase that negatively regulates the Wnt signaling pathway, were positively  
480 associated with *APC* protein abundance (**Figure S6E, third panel**) and that *BMP2R2*  
481 mutations were negatively correlated with *TGFBR2* protein levels (**Figure S6E**,  
482 **fourth panel**), both being members of the TGF-beta superfamily (Massague, 2012).  
483 Our data clearly demonstrate that a large portion of genomic variation affecting

484 mRNA levels is not always transferred to the proteome. We see that distant protein  
485 changes attributed to variation in cancer driver genes can be regulated directly at the  
486 protein level and are not conspicuous at the mRNA level, with indication of further  
487 causal effects including enzyme substrate relationships.

488

### 489 **Protein complexes associated with microsatellite instability**

490 Loss of DNA mismatch repair activity is responsible for the microsatellite instability  
491 (MSI) observed in 15% of all colorectal cancers. MSI tumours are associated with  
492 better prognosis and differential response to chemotherapy (Boland and Goel, 2010).  
493 An improved understanding of the effect of MSI on cellular processes thus has the  
494 potential to explain some of these clinical features. We detected 10 differentially  
495 regulated modules between the MSI-high and MSI-low cell lines (Welch's t-test,  
496 permutation based FDR<0.05). This encompasses 172 proteins (**Figure 6A**) that  
497 include a subset of 33 genes previously attributed to MSI events in colorectal tumors  
498 (Kim et al., 2013) such as MSH6, MSH3, PMS2, BAX and RAD50. The STRING  
499 interactions between the MSI associated proteins are depicted in **Figure 6B**,  
500 substantiating the functional relationships between this set of proteins. We  
501 additionally identified epigenetic dysregulation characterized by reduced levels of  
502 histone methyltransferase (KMT2D, PAXIP1, NCOA6, SETD1B, KMT2C, KMT2B  
503 and KDM6A). We also detect histone deacetylation (HDAC3 and NCOR1) protein  
504 complexes associated with these events. This network indicates the suppression of  
505 two members of the INO80 chromatin remodelling complex (INO80D and ACTL6A)

506 in MSI-high cells and can explain the down-regulation of the Arp2/3 protein complex  
507 by protein interactions with ACTL6A. Other distinct complexes we have identified  
508 negatively affected by MSI were the exocyst complex, which is implicated in  
509 targeting secretory vesicles to specific docking sites on the plasma membrane  
510 (Heider and Munson, 2012) and the SKI complex (SKIV2L, TTC37 and WDR61),  
511 which is involved in exosome-mediated RNA decay (Wang et al., 2005). Overall, this  
512 alludes to multiple epigenetic mechanisms playing a role in the MSI pathogenesis,  
513 and also suggests a new role for exocyst in this phenotype. The MSI up-regulated  
514 modules showed over-representation of proteins from the loci 8p21 and 18q21  
515 including SMAD4. Although high SMAD4 levels have been previously associated  
516 with MSI and better prognosis in colon cancer (Isaksson-Mettavainio et al., 2012),  
517 our data suggest that the observed differences stem from a mutually exclusive  
518 SMAD4 copy number alteration (loss) with MSI.

519

## 520 **Proteomic subtypes of colorectal cancer cell lines**

521 To explore whether our deep proteomes recapitulate tissue level subtypes of  
522 colorectal cancer and to provide insight into the cellular and molecular heterogeneity  
523 of the colorectal cancer cell lines, we performed unsupervised clustering based on  
524 the quantitative profiles of 7,330 proteins without missing values by class discovery  
525 using the ConsensusClusterPlus method (Wilkerson and Hayes, 2010). Optimal  
526 separation by k-means clustering was reached using 7 colorectal proteomic  
527 subtypes (CPS) (**Figure S7A and Figure 7A**).



528 Our proteomic clusters overlapped very well with previously published tissue  
529 subtypes (annotations from Medico et al., **Figure S7B**) (Medico et al., 2015),  
530 especially with the classification described by De Sousa E Melo et al. (De Sousa E  
531 Melo et al., 2013). Previous classifiers have commonly subdivided samples along the  
532 lines of 'Epithelial' (lower crypt and crypt top), 'MSI-H' and 'Stem-like', with varying  
533 descriptions (Guinney et al., 2015). In contrast, our high depth proteomic dataset not  
534 only captured the commonly identified classification features, but provides increased  
535 resolution to further subdivide these groups. The identification of unique proteomic  
536 features pointing to key cellular functions, gives insight into the molecular basis of  
537 these subtypes, and provides clarity as to the differences between them (**Figure 7A**).  
538 A detailed description of the unique proteomic features of our COREAD classification  
539 is provided in **Table S13**.

540 Cell lines with a canonical epithelial phenotype (previously classified as CCS1 by De  
541 Sousa E Melo et al., 2013) clustered together, but are now divided into 3 subtypes  
542 (CPS1, CPS2, CPS3). These subtypes all displayed high expression of HNF4A,  
543 indicating a more differentiated state. While subtypes CPS1 and CPS3 contain  
544 Transit Amplifying cell phenotypes (Sadanandam et al., 2013), CPS2 is largely  
545 characterised by a Goblet cell signature (**Figure S7B**). CPS2 is also enriched in lines  
546 that are hypermutated, and while some are MSI-H, the MSI-negative/hypermutated  
547 lines (HT115, HCC2998, HT55) (Medico et al., 2015) all cluster in this group (**Figure**  
548 **S7B**). Transit Amplifying subtype CPS3 can be distinguished from CPS1 by lower  
549 expression of cell cycle proteins (eg. CCND1), and low histone phosphorylation  
550 (possibly mediated by VRK3), as well as higher activation of PPAR signalling and

551 amino-acid metabolism pathways. CPS3 also contains lines (DIFI, NCI-H508) that  
552 are most sensitive to the anti-EGFR antibody Cetuximab (Medico et al., 2015).  
553 Further, this group correlates with a crypt top description 'Subtype A' (Budinska et  
554 al., 2013) while subtypes CPS1 and CPS2 are associated with the lower crypt  
555 'Subtype B' (Budinska et al., 2013), (**Figure S7B**).

556 The CPS4 subtype is the canonical MSI-H cluster, with a strong correlation with the  
557 CCS2 cluster identified by De Sousa E Melo et al.. These lines have also been  
558 commonly associated with a less differentiated state by other classifiers, and this is  
559 reinforced by our dataset; subtype CPS4 has low levels of the HNF4A-CDX2  
560 module, rendering this group clearly distinguishable from CPS2 (**Figure 7A**). The  
561 separation into two distinct MSI-H/Hypermethylated classifications was also observed  
562 by Guinney et al., (2015), and may have implications for patient therapy and  
563 prognosis. Significantly, CPS4 displays low expression of ABC transporters, which  
564 may contribute to the better response rates seen in MSI-H patients (Popat et al.,  
565 2005).

566 The origin of CPS5 is less well defined, as it expresses intermediate levels of  
567 HNF4A. However, it is characterized by moderate down-regulation of cell cycle,  
568 ribosome and spliceosome modules, and displays low levels of MLH1 and AKT3  
569 proteins (**Figure 7A**). Interestingly, the phosphorylation landscape of CPS5 exhibits  
570 a global low phosphorylation, particularly in microtubule cytoskeleton and adherens  
571 junction proteins.

572 Lastly, we capture the commonly observed colorectal ‘Stem-like’ subgroup, which is  
573 represented in subtypes CPS6 and CPS7 (**Figure 7A, S7B**). Both subtypes exhibit  
574 stem-like expression profiles, with very low levels of HNF4A and CDX1 transcription  
575 factors (Chan et al., 2009; Garrison et al., 2006; Jones et al., 2015). Cells in both  
576 subtypes commonly exhibit loss of 9p21.3 including *CDKN2A* and *CDKN2B*, while  
577 this is rarely seen in other subtypes. Interestingly, while CPS6 displays activation of  
578 the Hippo signalling pathway and loss of 18q21.2 (*SMAD4*), CPS7 has a  
579 mesenchymal profile, with low expression of CDH1 and AXIN2, and high Vimentin.  
580 The overall strong suppression of cell adhesion and tight junction components may  
581 be influenced by low expression of KLF5 (Zhang et al., 2013).

582

### 583 **Pharmacoproteomic models are strong predictors of response to DNA** 584 **damaging agents**

585 Although a number of recent studies have investigated the power of different  
586 combinations of molecular data to predict drug response in colorectal cancer cell  
587 lines, these have been limited to using genomic (mutations and copy number),  
588 transcriptomic and methylation datasets (Iorio et al., 2016). We have shown above  
589 that the DNA and gene expression variations are not perfectly mirrored in the protein  
590 measurements. As such one might expect to gain predictive power for some  
591 phenotypic associations when also using the protein abundance changes. To date  
592 there has not been a comprehensive analysis of the effect on the predictive power  
593 from the addition of proteomics datasets in colorectal cancer. All of the colorectal cell

594 lines included in this study have been extensively characterised by sensitivity data  
595 (IC50 values) for 265 compounds (lorio et al., 2016). These include clinical drugs (n  
596 = 48), drugs currently in clinical development (n = 76), and experimental compounds  
597 (n = 141).

598 We built Elastic Net models that use as input features genomic (mutations and copy  
599 number gains/losses), methylation (CpG islands in gene promoters), gene  
600 expression and proteomic datasets. We were able to generate predictive models  
601 where the Pearson correlation between predicted and observed IC50 >0.4 in 91 of  
602 the 265 compounds (**Table S14**). Importantly, using the proteomics data enabled the  
603 construction of more predictive models than with any other feature type (**Figure 7B,**  
604 **top panel**). Examples of the proteomics predictive models for etoposide are shown  
605 in **Figure S7C**. Response to most drugs was often specifically predicted by one data  
606 type, with very little overlap (**Figure 7B bottom panel**). Interestingly, when response  
607 to a drug was predicted by both gene expression and proteomics, the protein-RNA  
608 correlation for genes associated with response tended to be higher (Mann-Whitney U  
609 test, p-value: 0.006) (**Figure S7D**).

610 Within the proteomics-based signatures found to be predictive for drug response, we  
611 frequently observed the drug efflux transporters ABCB1 and ABCB11 (8 and 7 out of  
612 43 respectively, 9 unique) (**Table S14**). In all models containing these proteins,  
613 elevated expression of the drug transporter was associated with drug resistance.  
614 Interestingly, ABCB1 and ABCB11 are very tightly co-regulated (Pearson's  $r=0.94$ ,  
615  $FDR= 5.99E-21$ ), suggesting a novel interaction. Notably, protein measurements of

616 these transporters correlated more strongly with response to these drugs than the  
617 respective mRNA measurements (mean Pearson's  $r=0.68$  and  $r=0.43$  respectively,  
618 Wilcoxon test  $p\text{-value}=0.0005$ ). This suggests that the protein expression levels of  
619 drug efflux pumps play a key role in determining drug response, and while predictive  
620 genomic biomarkers may still be discovered, the importance of proteomic  
621 associations with response should not be under-estimated.

622 To detect whether any specific classes of drug might be best predicted by each of  
623 the 4 molecular features, we initially classified each of the 91 agents into 21 classes  
624 depending on target class and biological activity (**Figure S7E**), and subsequently  
625 further reduced the dimensionality of the data by then classifying into 4 groups  
626 (termed 'kinase', 'DNA', 'chromatin' and 'other'). There was a significant enrichment  
627 for proteomics within the predictive models for the 'DNA' group of agents, which  
628 includes many chemotherapy agents and mitotic poisons (Mann-Whitney U test,  
629 nominal  $p\text{-value}$ : 0.01, FDR-corrected  $p\text{-value}$ : 0.0486) (**Figure 7C**). In contrast, 47%  
630 of the models specifically predicted using genomics features were for kinase  
631 inhibitors. This suggests that while the response to targeted kinase inhibitors can be  
632 modulated by point mutation (eg. BRAF mutations predict response to BRAF  
633 inhibitors), the response to broader DNA damaging agents is dependent on the  
634 expression levels of key proteomic subsets. Interestingly, NBEAL1 and PARD3B  
635 proteins that were found to be down-regulated by mutations were also among the top  
636 10 proteomics predictive models, were absent from the gene expression models,  
637 and 6 out of the 11 associated drugs were from the "DNA" category. Although the  
638 mechanism by which these proteins may affect drug sensitivity are unclear, it is

639 known that PARD3B is involved in asymmetrical cell division and cell polarization  
640 processes (Williams et al., 2014) and that both genes are located in chr2q33 and are  
641 associated with Amyotrophic Lateral Sclerosis 2 which suggests functional  
642 similarities. These examples also highlight the value of proteomics in better  
643 understanding the consequences of non-driver genomic alterations in drug sensitivity  
644 through the proteome.

## 645 **Discussion**

646 Our analysis of colorectal cancer cells using in-depth proteomics has yielded several  
647 significant insights into both fundamental molecular cell biology, and the molecular  
648 heterogeneity of colorectal cancer subtypes. Beyond static measurements of protein  
649 abundances, the quality of our dataset enabled the construction of a reference  
650 proteomic co-variation map with topological features reflecting the dynamic interplay  
651 between protein complexes and biological processes in colorectal cancer cells.  
652 Notably, identification of protein complexes and network topologies in such a global  
653 scale would require the analysis of hundreds of protein pull-downs and thousands  
654 hours of analysis (Hein et al., 2015) thus our approach can serve as a time effective  
655 screening tool for the study of protein networks. Another novel aspect that emerged  
656 from our analysis is the maintenance of co-regulation at the level of net protein  
657 phosphorylation. This seems to be more pronounced in signalling pathways where  
658 the protein abundances are insufficient to indicate functional associations.  
659 Analogous study of co-regulation between different types of protein modifications  
660 could also enable the identification of modification cross-talk (Beltrao et al., 2013).

661 We show that the subunits of protein complexes tend to tightly maintain their total  
662 abundance stoichiometry post-transcriptionally which forms the basis for the better  
663 understanding of the higher order organization of the proteome. The primary level of  
664 co-regulation between proteins allows for prediction of human gene functions and  
665 the secondary assembly of the co-variome reveals the interdependencies of protein  
666 complexes and biological processes and uncovers possible pathway interplays.  
667 Importantly, our data can be used in combination with genetic interaction screens  
668 (Costanzo et al., 2016) to explore whether gene essentiality meets the protein co-  
669 regulation principles. Our catalogue of 210,000 weighted interactions can help the  
670 selection of protein hubs representing the best predictors of interactomes in pull-  
671 down assays. Moreover, the identification of proteins with outlier profiles from the  
672 conserved profile of their known interactors, within a given complex, can point to  
673 their pleiotropic roles in the associated processes.

674 The simplification of the complex proteomic landscapes enables a more direct  
675 alignment of genomic features with cellular functions and delineates how genomic  
676 variation is received by protein networks and how this is disseminated throughout the  
677 proteome. This framework also proved very efficient to identify upstream regulatory  
678 events that link transcription factors to their transcriptional targets at the protein level  
679 and explained the components of the co-variome not strictly shaped by physical  
680 protein interactions. To a smaller degree the module-based analysis was predictive  
681 of co-occurring genomic variants exposing paradigms of simple cause-and-effect  
682 proteogenomic features of the cell lines.

683 We show that mutations largely affect protein abundances directly at the protein level  
684 with a higher pressure on the chromatin modification protein class. Targeted  
685 depletion of key chromatin modifiers by CRISPR/cas9 followed by proteomic  
686 analysis confirmed that the effects of genomic variation on distant gene products,  
687 physically related with the directly affected proteins, can be explained by the  
688 mechanisms that define protein co-variation. The latter is supported by the  
689 observation that the severity of the distant effects is well predicted by the co-variation  
690 consistency and the topological features of the correlation networks. Additionally, this  
691 analysis indicated that directionality can be another characteristic of such  
692 interactions.

693 We provide evidence that colorectal cancer subtypes derived from tissue level gene  
694 expression datasets are largely reproduced at the proteome level which further  
695 resolves the main subtypes into groups that reflect a possible cell type of origin and  
696 the underlying differences in genomic alterations. This robust functional  
697 characterization of the COREAD cell lines can be a useful resource to guide cell line  
698 selection in targeted cellular and biochemical experimental designs where cell line  
699 specific biological features can bias the results. Importantly, proteomics analysis  
700 highlighted that protein variation better predicts responses to drugs that interfere with  
701 cell cycle and DNA replication and that the expression of key protein components  
702 such as ABC transporters is critical to predicting drug response in colorectal cancer.  
703 While further work is required to establish these as validated biomarkers of patient  
704 response in clinical trials, numerous studies have noted the role of these channels in  
705 aiding drug efflux (Chen et al., 2016). Overall, our Elastic Net models suggest that



706 expression of a single protein alone may not be sufficient to predict drug resistance,  
707 and consideration of a panel of markers may be required. This study demonstrates  
708 that proteomics is the technology of choice for functional systems biology and  
709 provides a valuable resource for the study of regulatory variation in cancer cells.

## 710 **Author Contributions**

711 Conceptualization, J.S.C. & U.M.; Methodology, T.I.R., S.W.; Mass Spectrometry  
712 T.I.R.; Proteomics Data Analysis, T.I.R., E.G., M.S., S.W., J.C.W., P.B., J.S-R.; QTL  
713 Analysis, F.Z.G., E.G., A.B., J.S-R.; O.S.; Drug Data Analysis, N.A., M.M., M.S.,  
714 M.Y., J.S-R.; S.W., T.I.R., L.W., U.M.; CRISPR Lines, C.A., D.J.A.; Writing – Original  
715 Draft, T.I.R., S.W., L.W., U.M. J.S.C.; Writing - Review & Editing, All.

## 716 **Acknowledgments**

717 This work was funded by the Wellcome Trust (086375 and 102696). SPW is funded  
718 by the ERC Synergy Project CombatCancer. We would like to thank members of the  
719 Cancer Genome Project for helpful discussions and Sarah A. Teichmann for  
720 discussions and general suggestions about the manuscript.

721

722

723

724

725

726

727

728

729 **References**

730

- 731 Bateman, N.W., Tan, D.F., Pestell, R.G., Black, J.D., and Black, A.R. (2004). Intestinal tumor  
732 progression is associated with altered function of KLF5. *Journal of Biological Chemistry* 279,  
733 12093-12101.
- 734 Beltrao, P., Bork, P., Krogan, N.J., and van Noort, V. (2013). Evolution and functional cross-  
735 talk of protein post-translational modifications. *Molecular systems biology* 9, 714.
- 736 Berthon, J., Fujikane, R., and Forterre, P. (2009). When DNA replication and protein  
737 synthesis come together. *Trends in biochemical sciences* 34, 429-434.
- 738 Boland, C.R., and Goel, A. (2010). Microsatellite Instability in Colorectal Cancer.  
739 *Gastroenterology* 138, 2073-U2087.
- 740 Brockman, J.L., Gross, S.D., Sussman, M.R., and Anderson, R.A. (1992). Cell cycle-  
741 dependent localization of casein kinase I to mitotic spindles. *Proceedings of the National*  
742 *Academy of Sciences of the United States of America* 89, 9454-9458.
- 743 Budinska, E., Popovici, V., Tejpar, S., D'Ario, G., Lapique, N., Sikora, K.O., Di Narzo, A.F.,  
744 Yan, P., Hodgson, J.G., Weinrich, S., *et al.* (2013). Gene expression patterns unveil a new  
745 level of molecular heterogeneity in colorectal cancer. *The Journal of pathology* 231, 63-76.
- 746 Chan, C.W.M., Wong, N.A., Liu, Y., Bicknell, D., Turley, H., Hollins, L., Miller, C.J., Wilding,  
747 J.L., and Bodmer, W.F. (2009). Gastrointestinal differentiation marker Cytokeratin 20 is  
748 regulated by homeobox gene CDX1. *Proceedings of the National Academy of Sciences of*  
749 *the United States of America* 106, 1936-1941.
- 750 Chen, Z., Shi, T., Zhang, L., Zhu, P., Deng, M., Huang, C., Hu, T., Jiang, L., and Li, J.  
751 (2016). Mammalian drug efflux transporters of the ATP binding cassette (ABC) family in  
752 multidrug resistance: A review of the past decade. *Cancer letters* 370, 153-164.
- 753 Costanzo, M., VanderSluis, B., Koch, E.N., Baryshnikova, A., Pons, C., Tan, G., Wang, W.,  
754 Usaj, M., Hanchard, J., Lee, S.D., *et al.* (2016). A global genetic interaction network maps a  
755 wiring diagram of cellular function. *Science* 353.
- 756 De Sousa E Melo, F., Wang, X., Jansen, M., Fessler, E., Trinh, A., de Rooij, L.P.M.H., de  
757 Jong, J.H., de Boer, O.J., van Leersum, R., Bijlsma, M.F., *et al.* (2013). Poor-prognosis  
758 colon cancer is defined by a molecularly distinct subtype and develops from serrated  
759 precursor lesions. *Nature medicine* 19, 614-618.
- 760 Garrison, W.D., Battle, M.A., Yang, C.H., Kaestner, K.H., Sladek, F.M., and Duncan, S.A.  
761 (2006). Hepatocyte nuclear factor 4 alpha is essential for embryonic development of the  
762 mouse colon. *Gastroenterology* 130, 1207-1220.
- 763 Guinney, J., Dienstmann, R., Wang, X., de Reynies, A., Schlicker, A., Soneson, C., Marisa,  
764 L., Roepman, P., Nyamundanda, G., Angelino, P., *et al.* (2015). The consensus molecular  
765 subtypes of colorectal cancer. *Nature medicine* 21, 1350-1356.
- 766 Heider, M.R., and Munson, M. (2012). Exorcising the exocyst complex. *Traffic* 13, 898-907.

767 Hein, M.Y., Hubner, N.C., Poser, I., Cox, J., Nagaraj, N., Toyoda, Y., Gak, I.A., Weisswange,  
768 I., Mansfeld, J., Buchholz, F., *et al.* (2015). A human interactome in three quantitative  
769 dimensions organized by stoichiometries and abundances. *Cell* 163, 712-723.  
770 Iorio, F., Knijnenburg, T.A., Vis, D.J., Bignell, G.R., Menden, M.P., Schubert, M., Aben, N.,  
771 Goncalves, E., Barthorpe, S., Lightfoot, H., *et al.* (2016). A Landscape of Pharmacogenomic  
772 Interactions in Cancer. *Cell* 166, 740-754.  
773 Isaksson-Mettavainio, M., Palmqvist, R., Dahlin, A.M., Van Guelpen, B., Rutegard, J., Oberg,  
774 A., and Henriksson, M.L. (2012). High SMAD4 levels appear in microsatellite instability and  
775 hypermethylated colon cancers, and indicate a better prognosis. *International journal of*  
776 *cancer Journal international du cancer* 131, 779-788.  
777 Jones, M.F., Hara, T., Francis, P., Li, X.L., Bilke, S., Zhu, Y.L., Pineda, M., Subramanian, M.,  
778 Bodmer, W.F., and Lal, A. (2015). The CDX1-microRNA-215 axis regulates colorectal  
779 cancer stem cell differentiation. *Proceedings of the National Academy of Sciences of the*  
780 *United States of America* 112, E1550-E1558.  
781 Kim, T.M., Laird, P.W., and Park, P.J. (2013). The Landscape of Microsatellite Instability in  
782 Colorectal and Endometrial Cancer Genomes. *Cell* 155, 858-868.  
783 Langfelder, P., and Horvath, S. (2008). WGCNA: an R package for weighted correlation  
784 network analysis. *BMC bioinformatics* 9, 559.  
785 Liu, C., Li, Y., Semenov, M., Han, C., Baeg, G.H., Tan, Y., Zhang, Z., Lin, X., and He, X.  
786 (2002). Control of beta-catenin phosphorylation/degradation by a dual-kinase mechanism.  
787 *Cell* 108, 837-847.  
788 Massague, J. (2012). TGF beta signalling in context. *Nat Rev Mol Cell Bio* 13, 616-630.  
789 McAlister, G.C., Nusinow, D.P., Jedrychowski, M.P., Wuhr, M., Huttlin, E.L., Erickson, B.K.,  
790 Rad, R., Haas, W., and Gygi, S.P. (2014). MultiNotch MS3 Enables Accurate, Sensitive, and  
791 Multiplexed Detection of Differential Expression across Cancer Cell Line Proteomes. *Anal*  
792 *Chem* 86, 7150-7158.  
793 McShane, E., Sin, C., Zauber, H., Wells, J.N., Donnelly, N., Wang, X., Hou, J., Chen, W.,  
794 Storchova, Z., Marsh, J.A., *et al.* (2016). Kinetic Analysis of Protein Stability Reveals Age-  
795 Dependent Degradation. *Cell*.  
796 Medico, E., Russo, M., Picco, G., Cancelliere, C., Valtorta, E., Corti, G., Buscarino, M.,  
797 Isella, C., Lamba, S., Martinoglio, B., *et al.* (2015). The molecular landscape of colorectal  
798 cancer cell lines unveils clinically actionable kinase targets. *Nature communications* 6, 7002.  
799 Mertins, P., Mani, D.R., Ruggles, K.V., Gillette, M.A., Clauser, K.R., Wang, P., Wang, X.,  
800 Qiao, J.W., Cao, S., Petralia, F., *et al.* (2016). Proteogenomics connects somatic mutations  
801 to signalling in breast cancer. *Nature* 534, 55-62.  
802 Muratani, M., and Tansey, W.R. (2003). How the ubiquitin-proteasome system controls  
803 transcription. *Nat Rev Mol Cell Bio* 4, 192-201.  
804 Ochoa, D., Jonikas, M., Lawrence, R.T., El Debs, B., Selkrig, J., Typas, A., Villen, J., Santos,  
805 S.D., and Beltrao, P. (2016). An atlas of human kinase regulation. *Molecular systems biology*  
806 12, 888.  
807 Park, C.H., Ryu, H.G., Kim, S.H., Lee, D., Song, H., and Kim, K.T. (2015). Presumed  
808 pseudokinase VRK3 functions as a BAF kinase. *Bba-Mol Cell Res* 1853, 1738-1748.  
809 Petsalaki, E., Helbig, A.O., Gopal, A., Pasculescu, A., Roth, F.P., and Pawson, T. (2015).  
810 SELPHI: correlation-based identification of kinase-associated networks from global phospho-  
811 proteomics data sets. *Nucleic acids research* 43, W276-282.  
812 Popat, S., Hubner, R., and Houlston, R.S. (2005). Systematic review of microsatellite  
813 instability and colorectal cancer prognosis. *J Clin Oncol* 23, 609-618.  
814 Ruepp, A., Waegele, B., Lechner, M., Brauner, B., Dunger-Kaltenbach, I., Fobo, G.,  
815 Frishman, G., Montrone, C., and Mewes, H.W. (2010). CORUM: the comprehensive  
816 resource of mammalian protein complexes--2009. *Nucleic acids research* 38, D497-501.

817 Sadanandam, A., Lyssiotis, C.A., Homicsko, K., Collisson, E.A., Gibb, W.J., Wullschleger,  
818 S., Ostos, L.C.G., Lannon, W.A., Grotzinger, C., Del Rio, M., *et al.* (2013). A colorectal  
819 cancer classification system that associates cellular phenotype and responses to therapy.  
820 *Nature medicine* *19*, 619-625.

821 Stefely, J.A., Kwiecien, N.W., Freiburger, E.C., Richards, A.L., Jochem, A., Rush, M.J.,  
822 Ulbrich, A., Robinson, K.P., Hutchins, P.D., Veling, M.T., *et al.* (2016). Mitochondrial protein  
823 functions elucidated by multi-omic mass spectrometry profiling. *Nature biotechnology* *34*,  
824 1191-1197.

825 Szklarczyk, D., Franceschini, A., Wyder, S., Forslund, K., Heller, D., Huerta-Cepas, J.,  
826 Simonovic, M., Roth, A., Santos, A., Tsafou, K.P., *et al.* (2015). STRING v10: protein-protein  
827 interaction networks, integrated over the tree of life. *Nucleic acids research* *43*, D447-452.

828 Wang, J., Ma, Z., Carr, S.A., Mertins, P., Zhang, H., Zhang, Z., Chan, D.W., Ellis, M.J.,  
829 Townsend, R.R., Smith, R.D., *et al.* (2016). Proteome profiling outperforms transcriptome  
830 profiling for co-expression based gene function prediction. *Mol Cell Proteomics*.

831 Wang, L.N., Lewis, M.S., and Johnson, A.W. (2005). Domain interactions within the Ski2/3/8  
832 complex and between the Ski complex and Ski7p. *Rna* a Publication of the Rna Society *11*,  
833 1291-1302.

834 Wilkerson, M.D., and Hayes, D.N. (2010). ConsensusClusterPlus: a class discovery tool with  
835 confidence assessments and item tracking. *Bioinformatics* *26*, 1572-1573.

836 Williams, S.E., Ratliff, L.A., Postiglione, M.P., Knoblich, J.A., and Fuchs, E. (2014). Par3-  
837 mInsc and G alpha(i3) cooperate to promote oriented epidermal cell divisions through LGN.  
838 *Nat Cell Biol* *16*, 758-U231.

839 Zhang, B., Wang, J., Wang, X., Zhu, J., Liu, Q., Shi, Z., Chambers, M.C., Zimmerman, L.J.,  
840 Shaddox, K.F., Kim, S., *et al.* (2014). Proteogenomic characterization of human colon and  
841 rectal cancer. *Nature* *513*, 382-387.

842 Zhang, B., Zhang, Z., Xia, S., Xing, C., Ci, X., Li, X., Zhao, R., Tian, S., Ma, G., Zhu, Z., *et al.*  
843 (2013). KLF5 activates microRNA 200 transcription to maintain epithelial characteristics and  
844 prevent induced epithelial-mesenchymal transition in epithelial cells. *Mol Cell Biol* *33*, 4919-  
845 4935.

846 Zhang, H., Liu, T., Zhang, Z., Payne, S.H., Zhang, B., McDermott, J.E., Zhou, J.Y., Petyuk,  
847 V.A., Chen, L., Ray, D., *et al.* (2016). Integrated Proteogenomic Characterization of Human  
848 High-Grade Serous Ovarian Cancer. *Cell* *166*, 755-765.

849

850

851

852

853

854

## 855 **Figure Legends**

### 856 **Figure 1**

857 Protein co-variation networks in colorectal cancer cell lines. A) Receiver Operating  
858 Characteristic (ROC) curve illustrating the performance of proteomics and  
859 microarrays based correlations to predict known interactions from the CORUM  
860 protein complexes database and from B) the STRING database. C) The basic  
861 structure of the full WGCNA network. Protein modules are color-coded and  
862 representative enriched terms are used for the annotation of the network. D) Protein  
863 abundance correlation networks derived from WGCNA analysis for enriched  
864 CORUM complexes.

865

### 866 **Figure 2**

867 The effect of colorectal cancer driver mutations on protein abundances. A)  
868 Association of driver mutations in colorectal cancer genes with the respective protein  
869 abundance levels (ANOVA test, permutation based FDR<5%). The cell lines are  
870 ranked by protein abundance and the bar on the top indicates the presence of  
871 mutations with brown mark. B) Volcano plot summarizing the effect of loss of  
872 function (LoF) and missense driver mutations on the respective protein abundances.

873

### 874 **Figure 3**

875 The global effects of genomic alterations on protein and mRNA abundances. A)  
876 Volcano plot summarizing the effect of all protein coding non-synonymous variants  
877 on the respective protein abundances (ANOVA test). B) Volcano plot summarizing  
878 the effect of all protein coding frameshift mutations on the respective protein  
879 abundances (ANOVA test). C) Volcano plot summarizing the effect of all protein  
880 coding frameshift mutations with both mRNA and protein measurements on the  
881 respective mRNA abundances (ANOVA test). D) Venn diagrams displaying the

882 overlap between proteins affected by all types of mutations and proteins affected by  
883 frameshift only mutations at different confidence levels (top panel) and the overlap  
884 between proteins and mRNAs affected by frameshift mutations at  $p\text{-value} < 0.05$   
885 (bottom panel). E) STRING network of the proteins down-regulated by frameshift  
886 mutations (permutation based  $FDR < 0.1$ ). F) Overrepresentation of Pfam domains  
887 (left panel) and PANTHER protein classes (right panel) for proteins negatively  
888 affected by mutations. G) Volcano plot summarizing the effect of recurrent copy  
889 number alterations on the protein abundances of the contained genes (binary data,  
890 ANOVA test). Red and blue points highlight genes with amplifications and losses  
891 respectively. Enlarged points highlight genes at  $FDR < 10\%$ . The bar plot (bottom  
892 panel) illustrates the number of affected proteins per genomic locus. Red and blue  
893 bars indicate amplifications and losses respectively. H) Distributions of the Pearson's  
894 correlation coefficients for CNA to mRNA (red) and CNA to protein (green)  
895 correlations considering all genes across 38 cell lines with normalized  $\log_2$  copy  
896 number values (source: Cancer Cell Line Encyclopedia). I) Self-Organizing Map  
897 trained on the Pearson correlation between CNA, mRNA and protein levels per gene  
898 across the cell lines. The fan plot within each neuron displays the magnitude of each  
899 one of the three vectors. Three main regulatory routes can be distinguished: good  
900 concordance between the three levels (left side cluster), CNAs corresponding to  
901 mRNAs but buffered at the protein level (top-middle cluster) and proteins well  
902 corresponding to mRNA irrespective of the presence of CNAs (bottom right cluster).

903

904

905

906

907

908

909 **Figure 4**

910 The consequences of mutations on protein complexes. A) Correlations networks  
911 filtered for known STRING interactions of proteins affected by mutations at p-  
912 value<0.05. The font size is proportional to the  $-\log_{10}(\text{p-value})$  and the font colour  
913 displays the effect of the mutations on protein abundances (blue=negative,  
914 red=positive). CORUM interactions are highlighted as green thick edges and  
915 representative protein complexes are labelled. B) Boxplots illustrating the association  
916 of ARID1A driver mutations with lower levels of the ARID1A complex. C) Protein  
917 abundance correlation network of the ARID1A, ARID2 and PBRM1 modules. Green  
918 edges denote known STRING interactions and the edge thickness is increasing  
919 proportionally to the interaction weight. The node colour displays the mRNA-to-  
920 protein Pearson correlation and the size of the nodes shows the protein variation. D)  
921 Heatmap summarizing the protein abundance  $\log_2$ fold-change values in the  
922 knockout clones compared to the WT clones for the proteins in the ARID1A, ARID2  
923 and PBRM1 modules. E) KEGG pathway and CORUM enrichment analysis for the  
924 proteomic analysis results of ARID1A, ARID2 and PBRM1 CRISPR knockouts in  
925 human iPS cells.

926

927 **Figure 5**

928 Proteome-wide quantitative trait loci (pQTL) analysis of cancer driver genomic  
929 alterations. A) Identification of cis and trans pQTLs in colorectal cancer cell lines  
930 considering colorectal cancer driver variants. The p-value and genomic coordinates  
931 for the most confident non-redundant protein-variant association tests are depicted in  
932 the Manhattan plot. B) Replication rates between independently tested QTL for each  
933 phenotype pair using common sets of genes and variants (N=6,456 genes). C)  
934 Representation of pQTLs as 2D plot of variants (y-axis) and associated genes (x-  
935 axis). Associations with  $q < 0.3$  are shown as dots coloured by the beta value (red:  
936 positive association, blue: negative association) while the size is increasing with the

937 confidence of the association. Cumulative plot of the number of associations per  
938 variant is shown below the 2D matrix.

939

## 940 **Figure 6**

941 Protein complexes associated with MSI. A) Heatmap of MSI-high associated proteins  
942 (Welch t-test, permutation based FDR<0.05). Columns represent proteins sorted  
943 horizontally based on color-coded modules and rows correspond to cell lines. The  
944 modules are labelled by significantly enriched terms on the right panel. B) STRING  
945 network of interconnected MSI-high associated proteins. The nodes are color-coded  
946 by module and distinct complexes are highlighted. Nodes with black outline have  
947 been previously found with MSI events in colorectal cancer by Kim et al.

948

## 949 **Figure 7**

950 Proteomics subtypes of colorectal cancer cell lines and drug associations. A) Cell  
951 lines are represented as columns, horizontally ordered by seven color-coded  
952 proteomics consensus clusters and aligned with microsatellite instability (MSI),  
953 published colorectal cancer subtypes by DeMelo classification, HNF4A protein  
954 abundance, cancer driver genomic alterations, differentially regulated proteins,  
955 selected enriched KEGG pathways, differentially regulated colorectal cancer proteins  
956 and differentially regulated phosphopeptides. The heatmap of the differentially  
957 regulated proteome was divided into 50 color-coded clusters. Enriched terms for  
958 each cluster are shown on the left. B) The number of drugs for which predictive  
959 models (i.e. models where the Pearson correlation between predicted and observed  
960 IC50s exceeds  $r > 0.4$ ) could be fitted is stratified per data type (top panel).  
961 Predictive models for more drugs are found by the use of proteomics data. A  
962 heatmap indicating for each drug and each data type whether a predictive model  
963 could be fitted (bottom panel). Drugs for which no predictive model could be fitted  
964 using any data type were omitted. Most drugs were specifically predicted by one  
965 data type. Examples of predictive models for each of the four data types are



966 highlighted. C) The number of drugs where response was specifically predicted by  
967 one molecular data type stratified by each of the four molecular data types and by  
968 four classes defined based on drug target and biological activity.

969

970

## 971 **Supplementary figures legends**

972

### 973 **Figure S1**

974 Proteome and phosphoproteome coverage. A) Workflow for quantitative global  
975 proteome and phosphoproteome analysis. 50 colorectal cancer cell lines (COREAD)  
976 were analysed using TMT-10plex in seven multiplex sets. The SW48 cell line was  
977 used as the reference sample in each set. Biological replicates of MDST8 cell line  
978 were included in two different sets and the 7th set corresponds to a biological  
979 replicate of the 6th set. These were used to evaluate the normalization and the batch  
980 effect correction methods. B) Number of protein groups (left panel) and unique  
981 phosphopeptides (right panel) identified per multiplex set are depicted as blue bars  
982 and cumulative number of identifications shown as red lines. C) Box plots of  
983 normalized  $\log_2$ Ratio values per cell line. D) Heatmap of the TMT scaled S/N values  
984 of the identified mutant peptides shown as rows. The columns represent the  
985 COREAD cell lines sorted from the least mutated (left) to the most mutated (right)  
986 cell line. E) Two example identification spectra of mutant peptides from KRAS and  
987 CTNNB1 along with the TMT quantification profiles. F) Box plots of Pearson  
988 correlation coefficients between un-related samples (All), paired samples from the  
989 7th replicate batch, the MDST8 replicate samples and inter-laboratory replicates for  
990 six cell lines from McAlister et al. G) Box plots of the mRNA to protein Pearson  
991 correlation between unrelated and paired cell lines. H) Scatter plot of protein  
992 variation versus mRNA variation expressed as median-normalized standard  
993 deviation (SD) across the cell lines.

994

995 **Figure S2**

996 Global distributions of gene-to-gene correlations. A) Distributions of Spearman's  
997 correlation coefficients between protein-protein pairs (left panel) and mRNA-mRNA  
998 pairs (right panel) for all pairs and for pairs with known relationships in the CORUM  
999 database. B) Correlation network of the WGCNA modules using the eigengene  
1000 profiles (Pearson>0.46, Benj. Hoch. FDR<0.01). Nodes represent WGCNA modules  
1001 labelled with enriched terms (GO-Slim, KEGG, CORUM, GSEA, ChEA, ENCODE  
1002 and Pfam) and are color-coded by ReactomeFI clusters. The size of the nodes is  
1003 proportional to the number of proteins in the module. Transcriptionally controlled  
1004 processes are highlighted with orange font and the processes with enriched  
1005 transcription factors are outlined. Black thick edges highlight examples of  
1006 associations between biological processes or protein complexes.

1007

1008 **Figure S3**

1009 Transcriptome-to-proteome correlation per protein class, protein modules correlation  
1010 plot and phosphorylated pathways. A) Gene-level mRNA-to-protein Pearson  
1011 correlations ranked by lowest to highest value. PANTHER protein classes with  
1012 negative or positive enrichment relatively to the mean of all mRNA-to-protein  
1013 correlations are displayed. B) Box plots illustrating the mRNA-to-protein correlation  
1014 for proteins characterized as exponentially degraded (ED) and non-exponentially  
1015 degraded (NED) by McShane et. al. 2016. C) Scatter plot illustrating the correlation  
1016 between tRNA methyltransferases and eukaryotic translation elongation factors. D)  
1017 Enriched KEGG pathways by DAVID analysis of all quantified phosphoproteins. E)  
1018 The distributions of Pearson coefficients for randomized and matched pairs of  
1019 phosphopeptide abundances versus protein abundances.

1020

1021

1022

1023 **Figure S4**

1024 *De novo* prediction of phosphorylation networks. A) Correlation network of 213  
1025 variable phosphopeptides (with protein abundance regressed out) belonging to 144  
1026 non-redundant kinases and the 787 most variable phosphopeptides of all other types  
1027 of proteins (significant Pearson correlations displayed in the network were filtered for  
1028 Benjamini-Hochberg adjusted  $p$ -value $<0.05$ ). The nodes are enlarged proportionally  
1029 to the number of direct edges and are color-coded based on ReactomeFI clustering.  
1030 Protein kinases are highlighted with bold font. B) Scatter plots of two significantly  
1031 correlating phosphoprotein pairs (VRK3-H2AFX and MAPK1-MAPK3) for which the  
1032 respective protein levels displayed insignificant correlation. C) Snapshots of the  
1033 MAPK and cell cycle KEGG pathways highlighting (pink) significantly correlating  
1034 phosphorylations. The Pearson correlation for each association is shown below the  
1035 pathways.

1036

1037 **Figure S5**

1038 The effects of mutations on protein phosphorylation. A) Volcano plot summarizing  
1039 the direct effects of mutations on protein phosphorylation. B) Box plots illustrating the  
1040 differential phosphorylation between mutated and wild-type cells considering  
1041 colorectal cancer driver mutations. C) The respective un-differentiated protein  
1042 abundances.

1043

1044

1045

1046

1047

1048 **Figure S6**

1049 Identification of mutations that cause loss of correlation stoichiometry and expression  
1050 quantitative trait loci analysis of cancer driver genomic alterations. A) Line plot  
1051 displaying the abundance profile of the proteins in the PBRM1 module. The top bar  
1052 indicates the total number of mutated genes within the module across the cell lines.  
1053 B) Scatter plots of protein pairs in which specific mutation cause severe divergence  
1054 from highly correlating profiles. C) Identification of *cis* and *trans* eQTLs in colorectal  
1055 cancer cell lines considering cancer driver variants. The p-value and genomic  
1056 coordinates for the most confident non-redundant mRNA-variant association tests  
1057 are depicted in the Manhattan plot. D) Representation of eQTLs as 2D plot of  
1058 variants (y-axis) and associated genes (x-axis). Associations with  $q < 0.3$  are shown  
1059 as dots coloured by the beta value (red: positive association, blue: negative  
1060 association) while the size is increasing with the confidence of the association.  
1061 Cumulative of the number of associations per variant is plotted below the 2D matrix.  
1062 E) Selected examples of protein networks and individual proteins with pQTLs  
1063 functionally associated with the cancer variants.

1064

1065 **Figure S7**

1066 Consensus clustering of colorectal cancer cell lines and drug response models for  
1067 each drug target class and for each data type. A) Proteome clusters were derived  
1068 based on consensus clustering. Optimal classification of the cell lines based on the  
1069 proteome quantified across all cell lines ( $N=7,330$ ) was derived by the application of  
1070 the ConsensusClusterPlus R package using 1,000 resampling repetitions in the  
1071 range of 2 to 10 clusters. The consensus matrices for target values  $k=5,6$  and 7 are  
1072 visualized (top left panel) along with the empirical cumulative distribution function  
1073 (CDF) plot which indicates the  $k$  at which the distribution reaches an approximate  
1074 maximum (top right panel). Cluster-consensus plot displaying the mean of all  
1075 pairwise consensus values between a cluster's members at each  $k$ . Balanced mean  
1076 consensus values are obtained at  $k=7$ . B) Overlap of the proteomics subtypes with

1077 tissue level classifications. C) Heatmap showing the proteomic signature associated  
1078 with response to Etoposide. D) Gene-level mRNA-to-protein Pearson correlation for  
1079 genes associated with drug response, for drugs that could be predicted by both gene  
1080 expression and proteomics data (overlapping) or for drugs that could only be  
1081 predicted gene expression or proteomics (non-overlapping). E) The number of drugs  
1082 where response was specifically predicted by one molecular data type, stratified by  
1083 each of the four molecular data types and by the 21 drug classes defined by Iorio et  
1084 al. (2016).

1085

# Figure 1

**A**

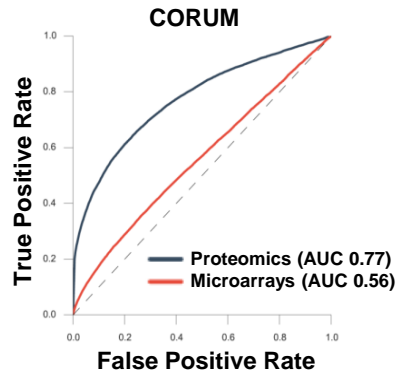

**B**

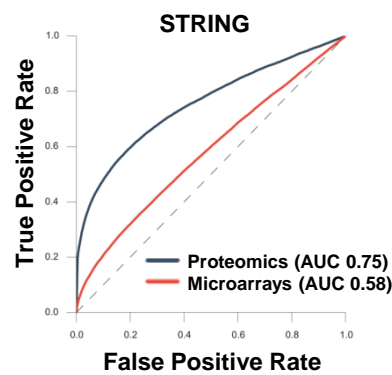

**C**

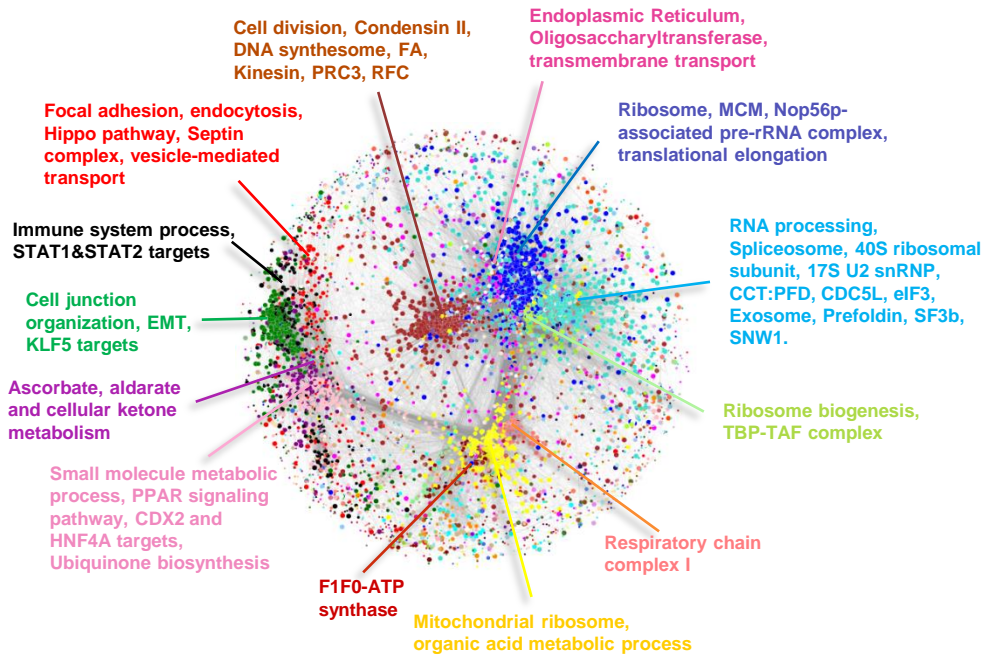

**D**

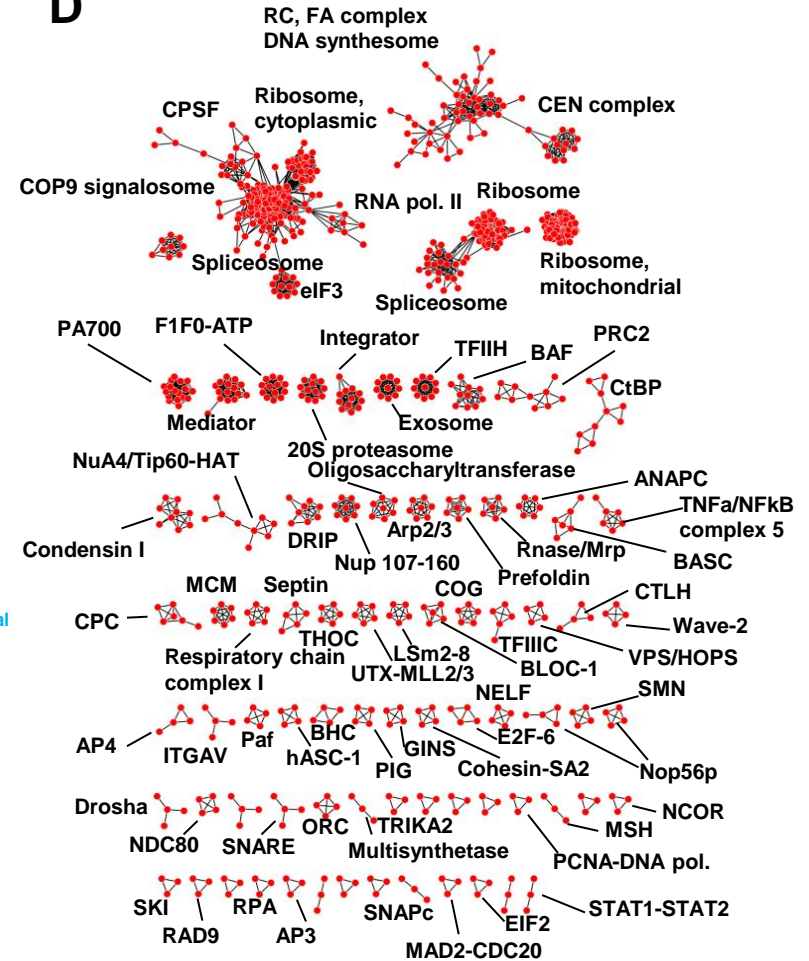

# Figure 2

**A**

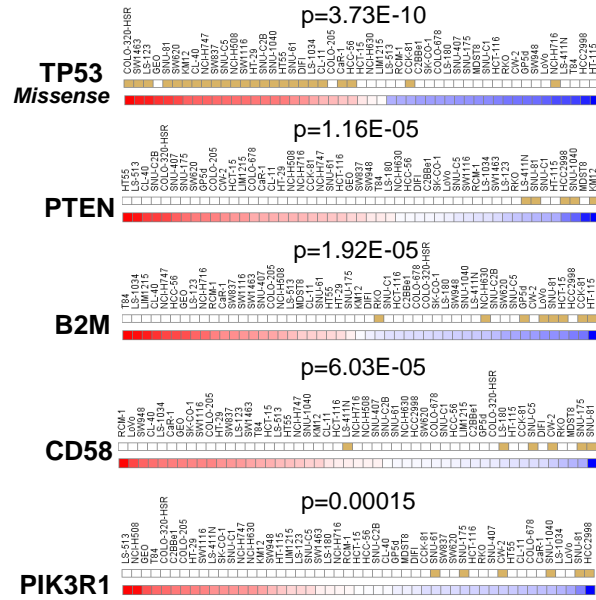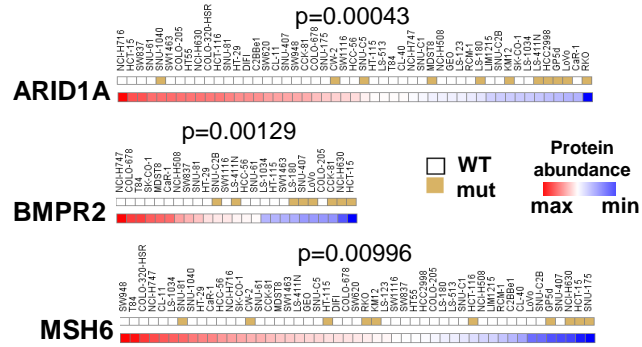

**B**

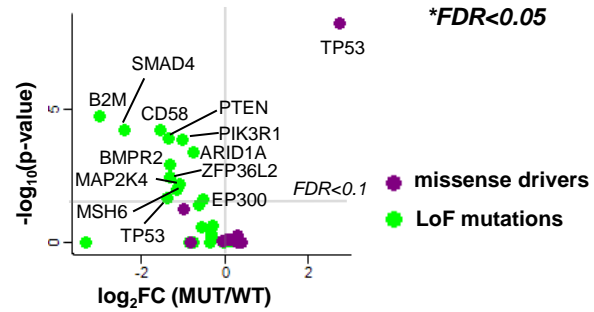

# Figure 3

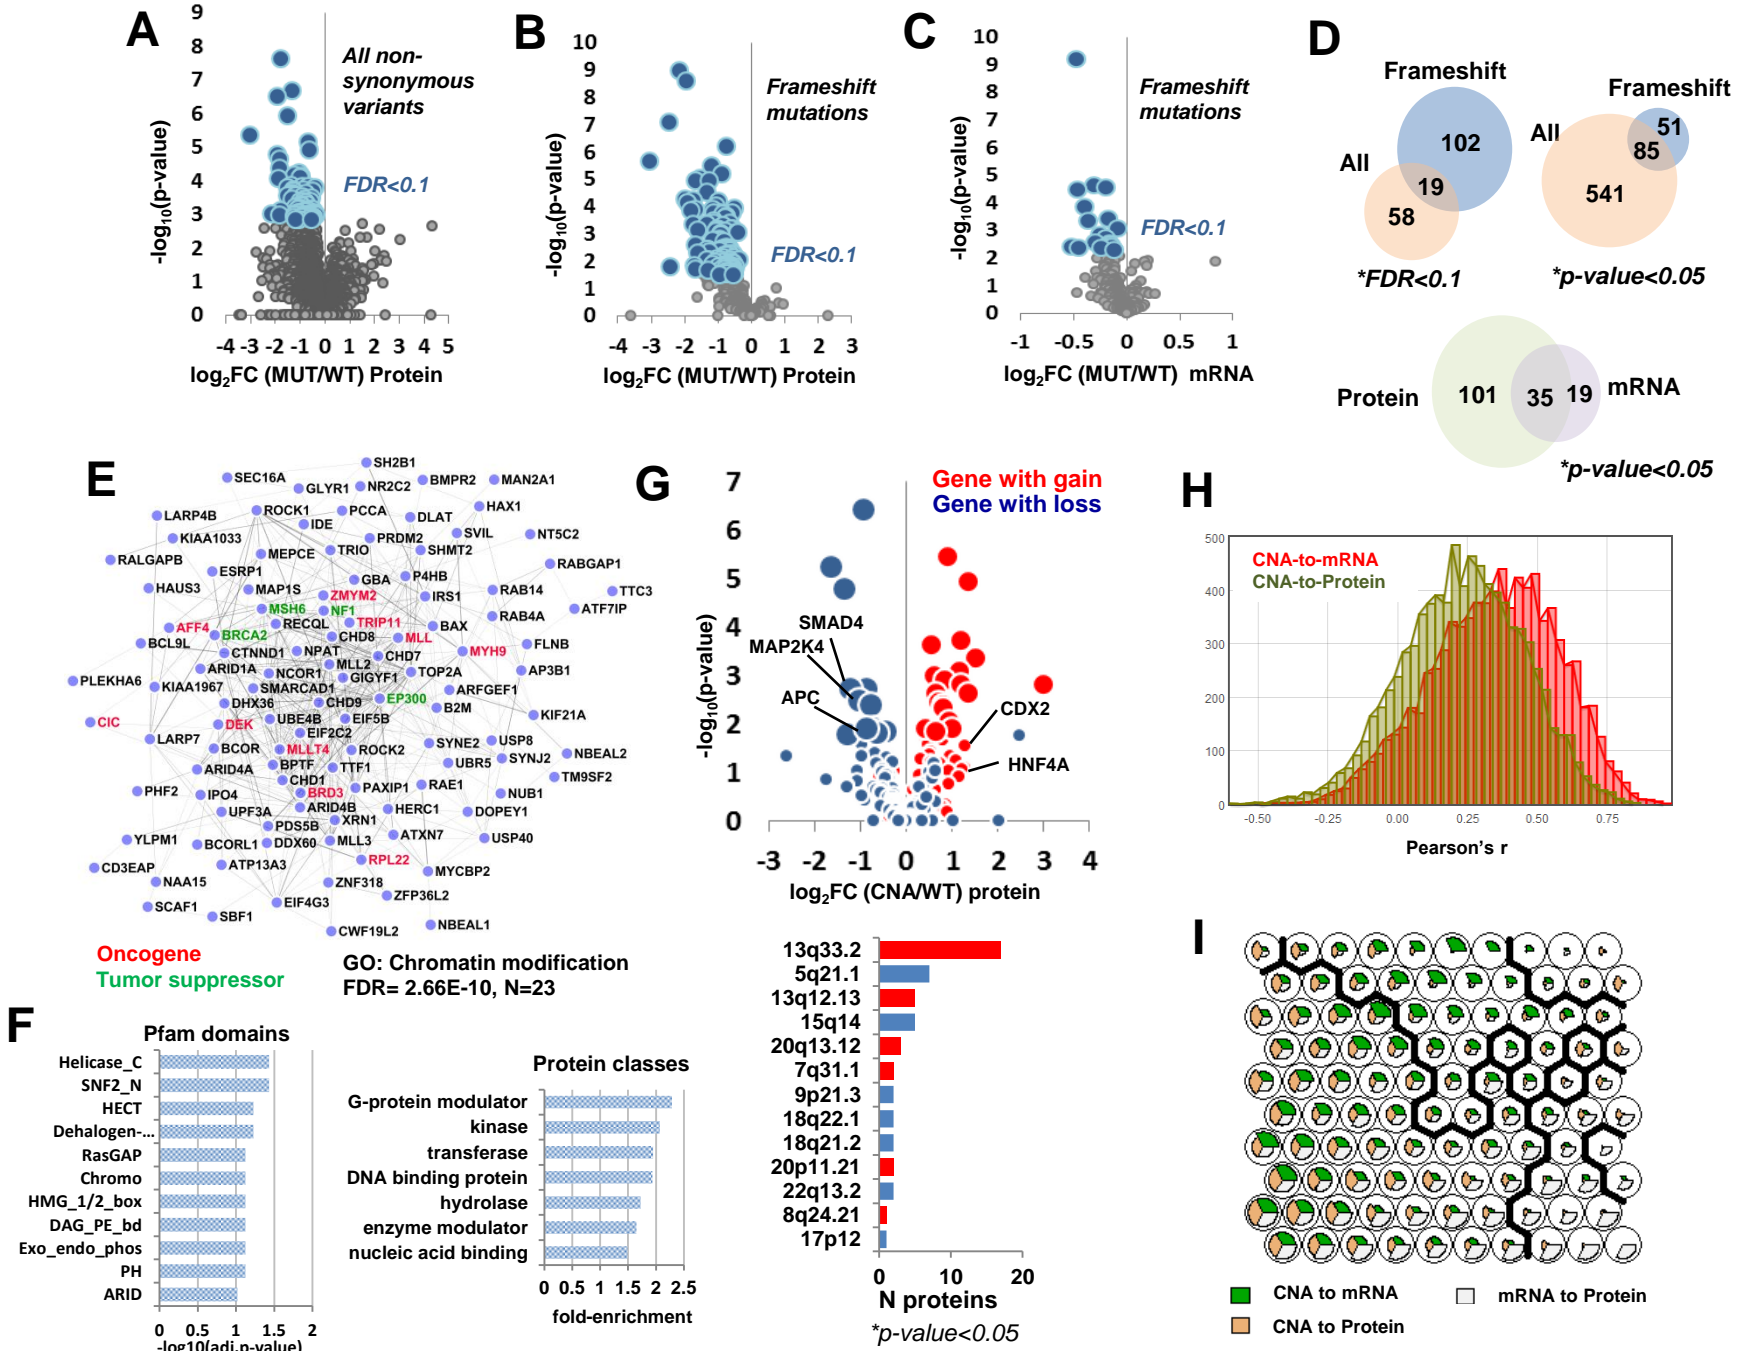



# Figure 4

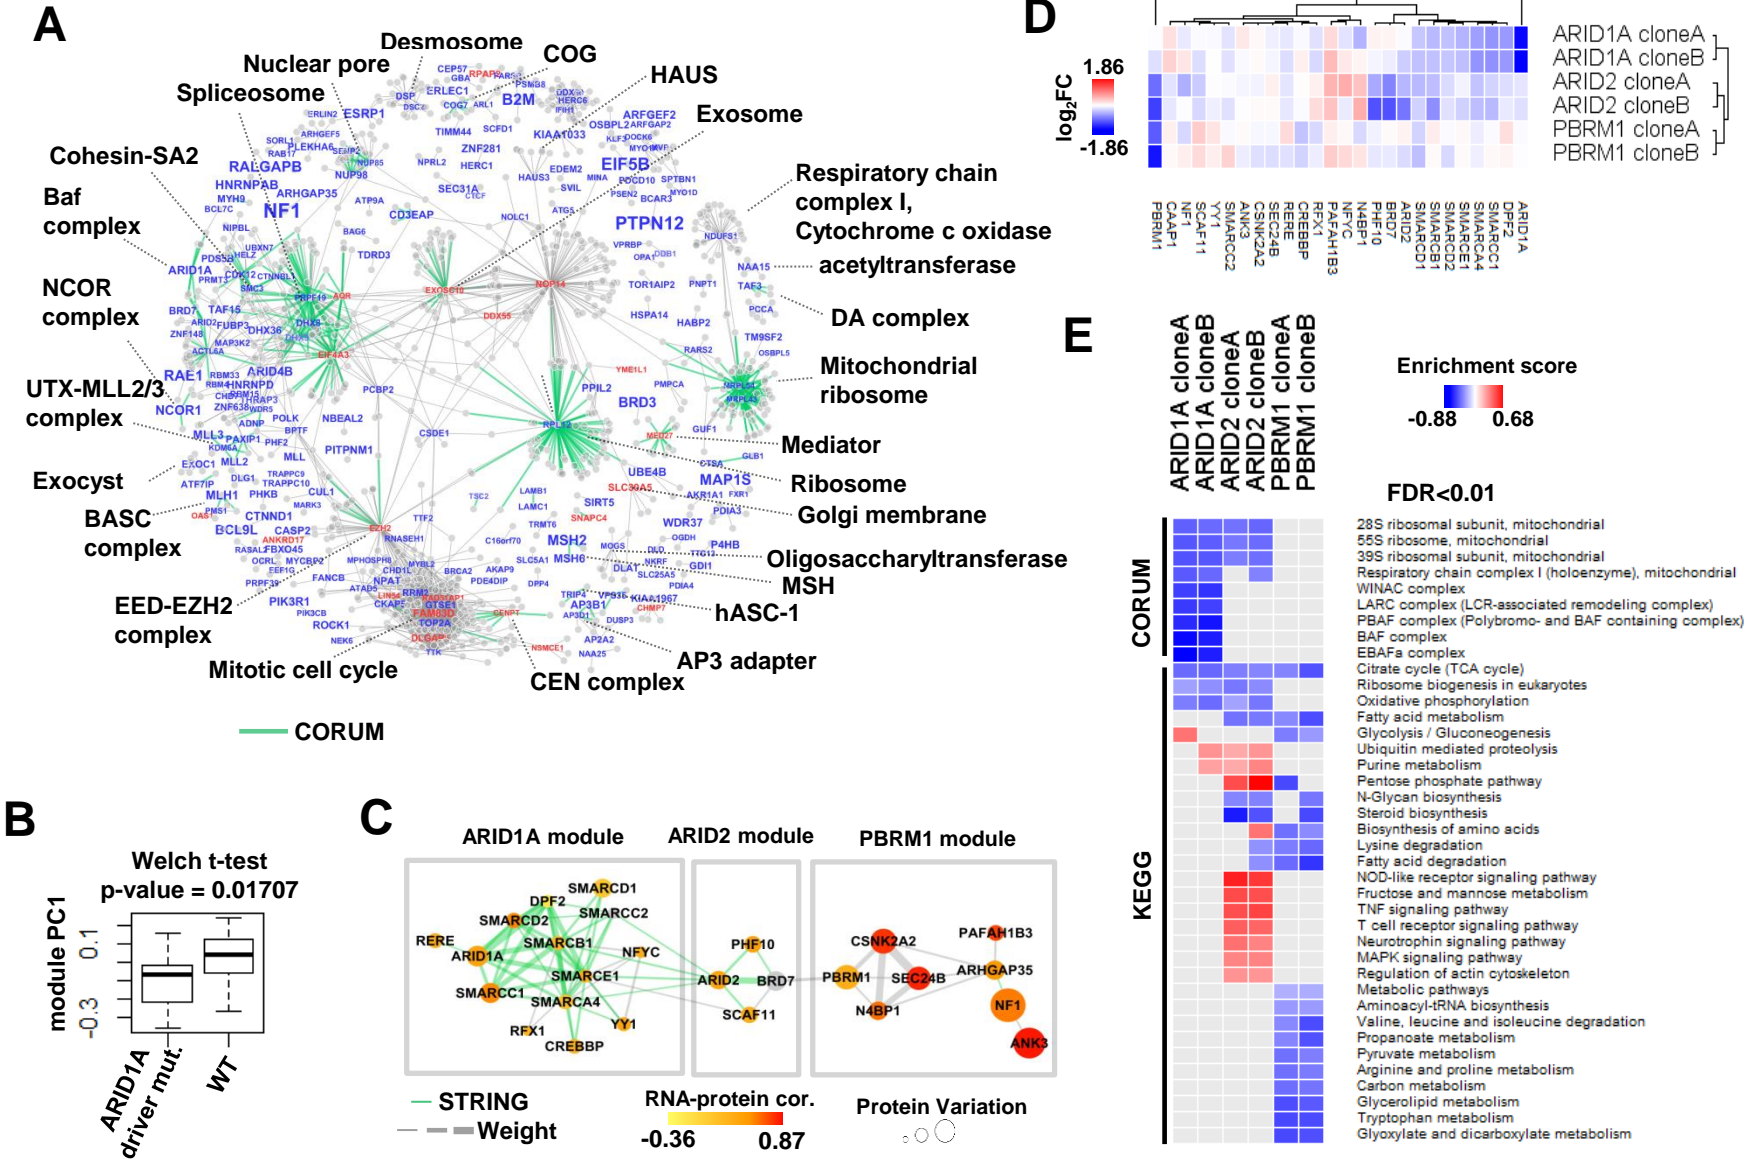

# Figure 5

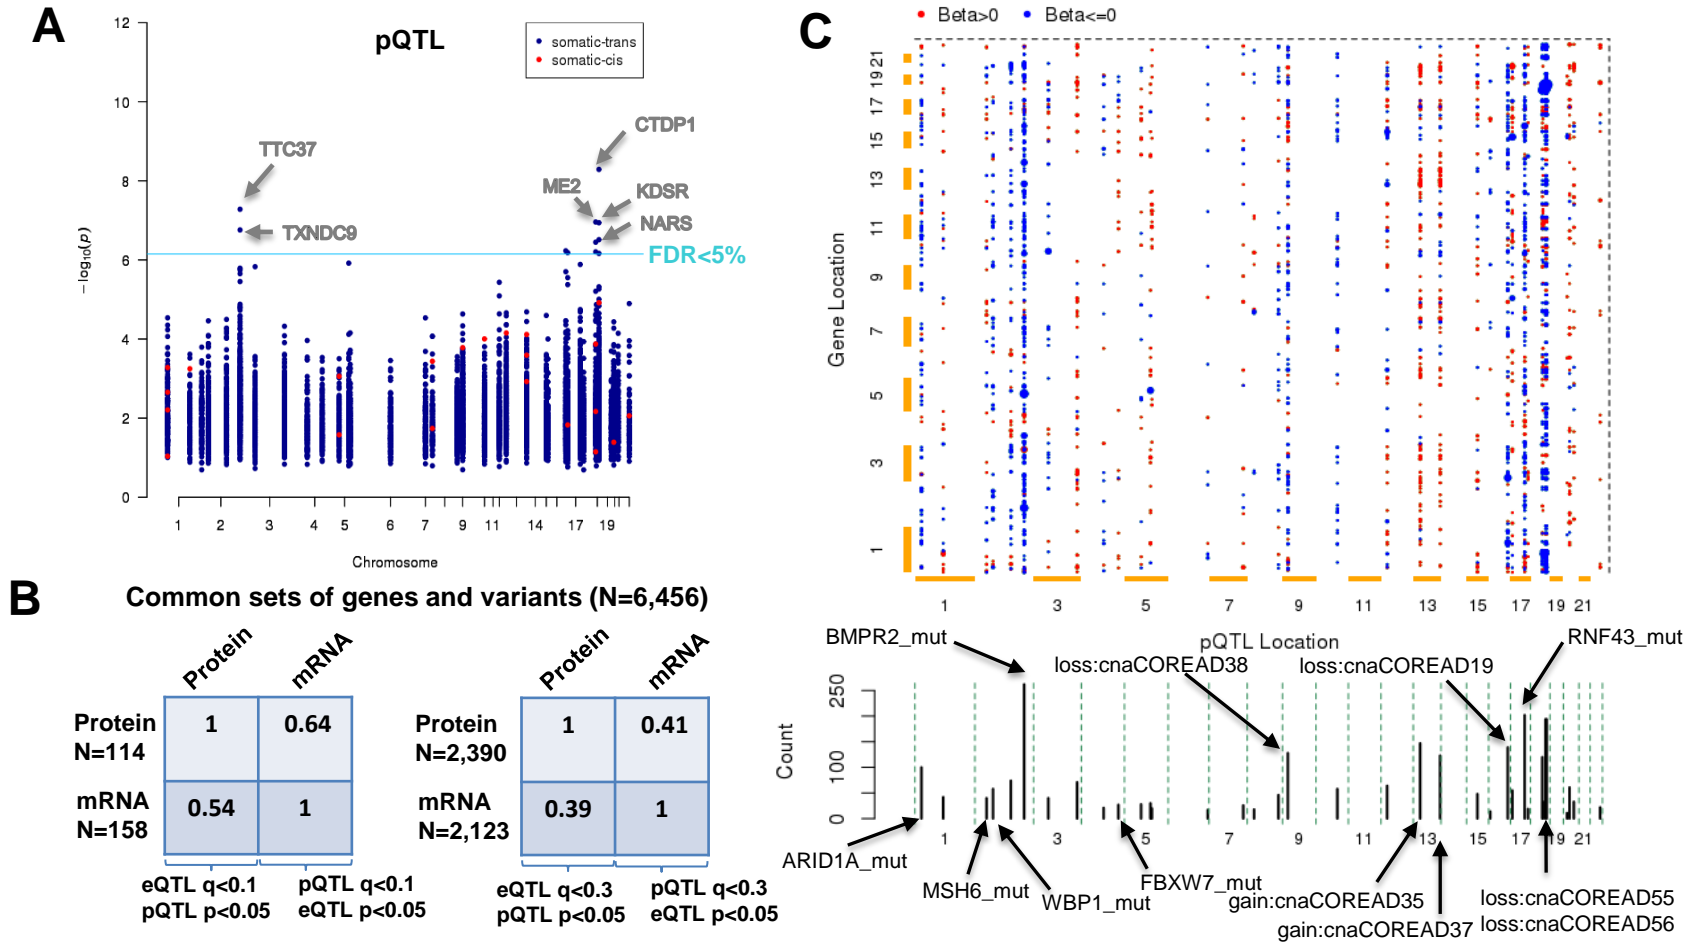

# Figure 6

**A**

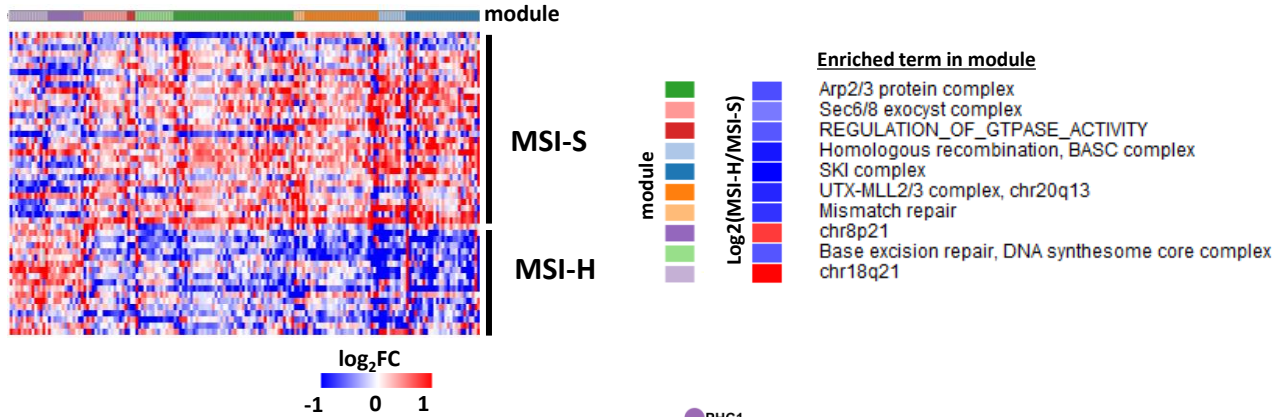

**B**

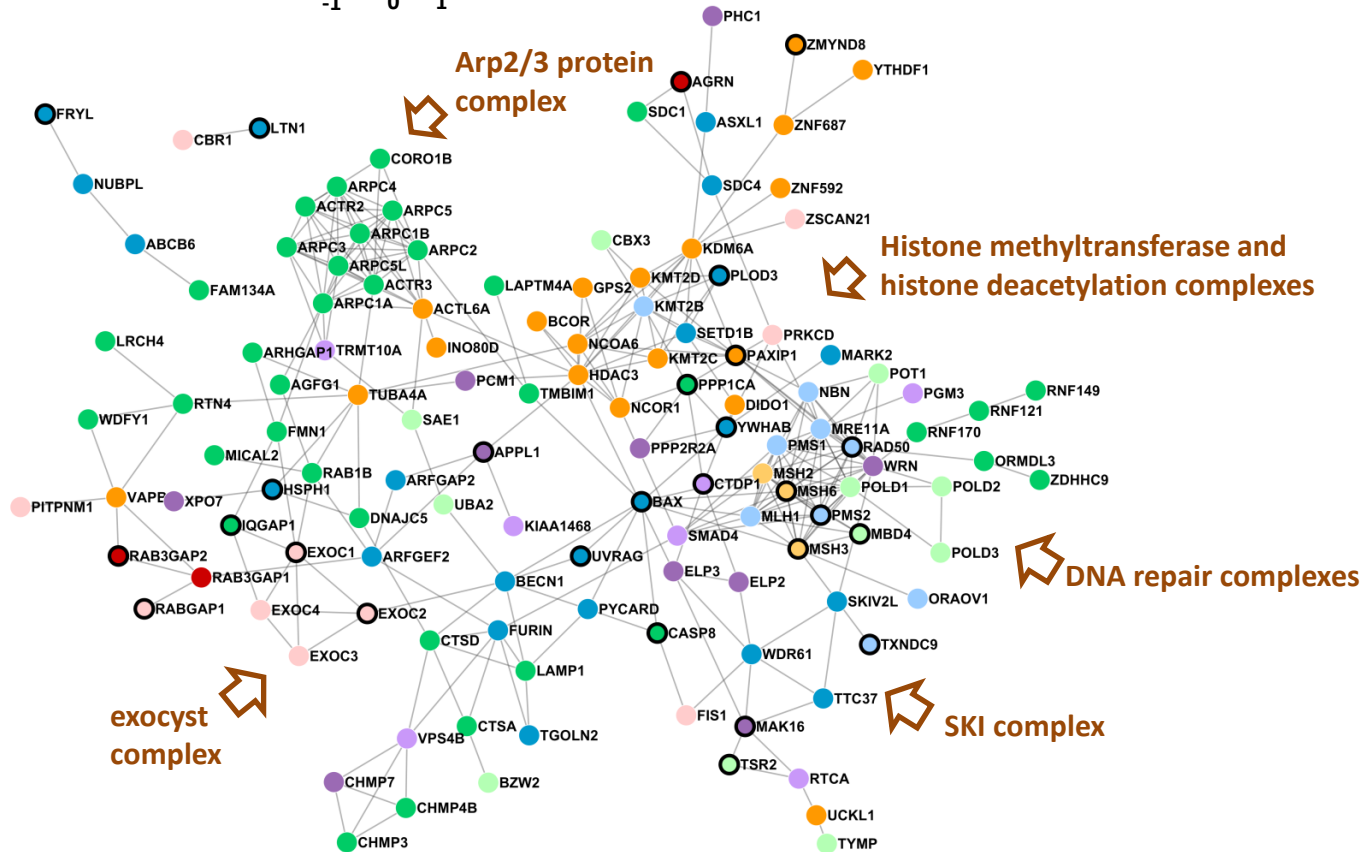

**A**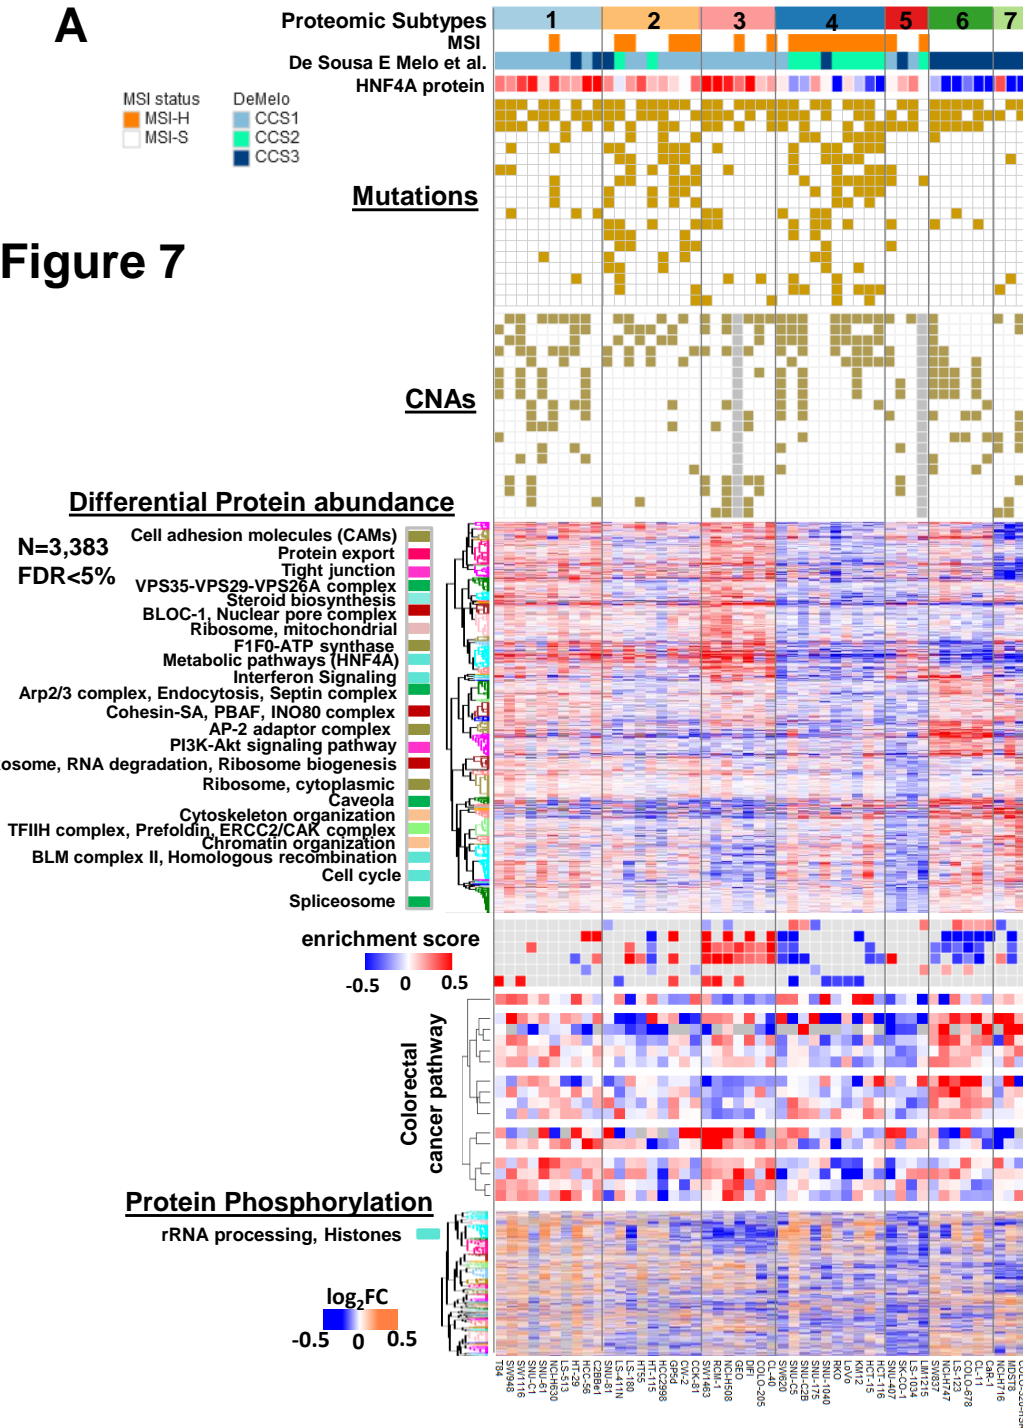

**Figure 7**

**B**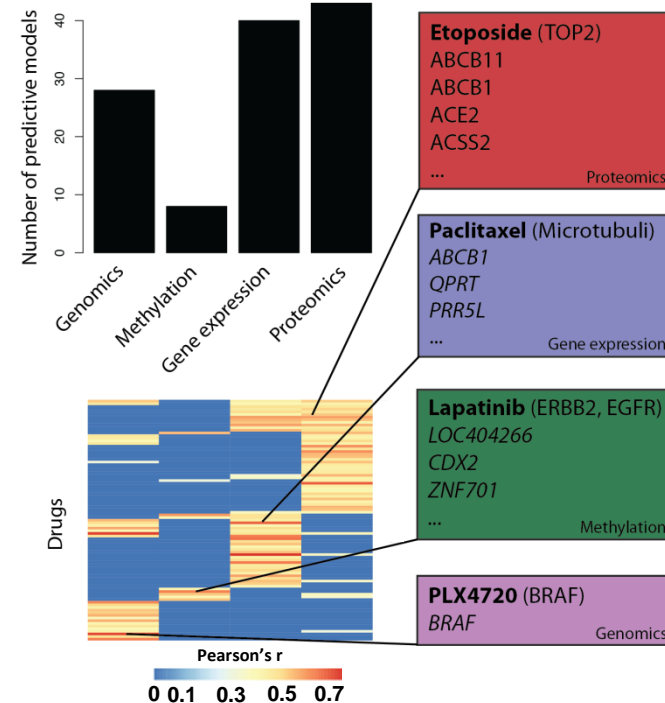**C**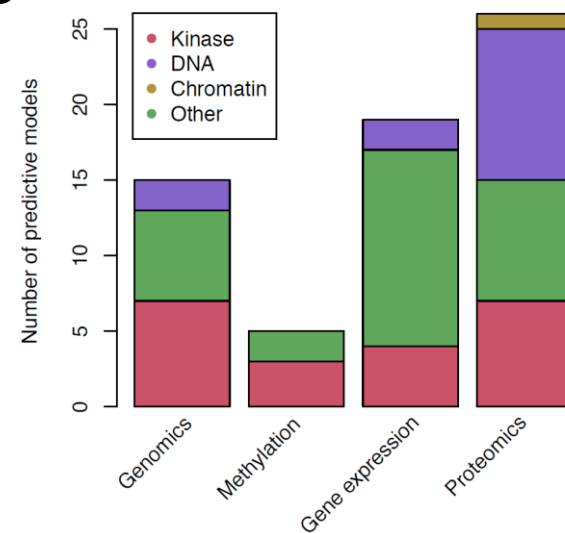

# Figure S1

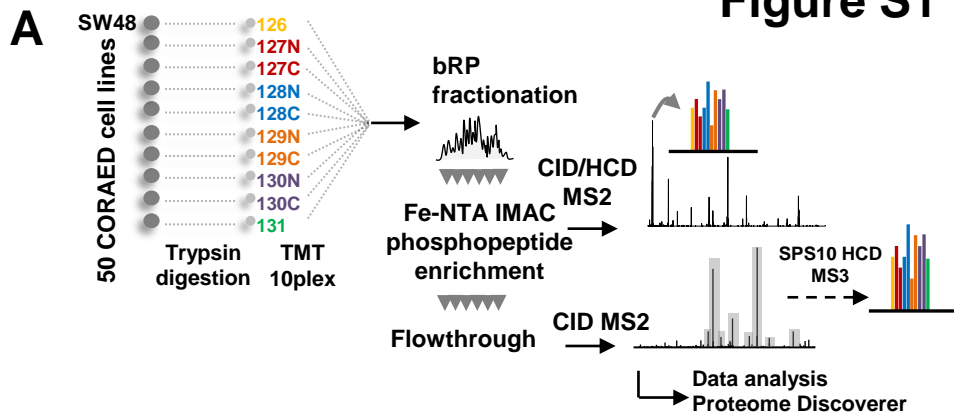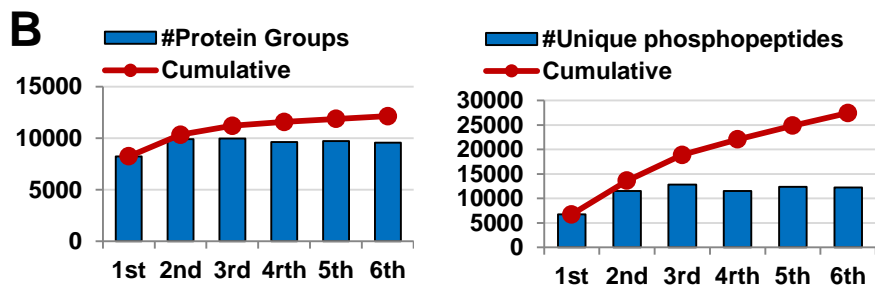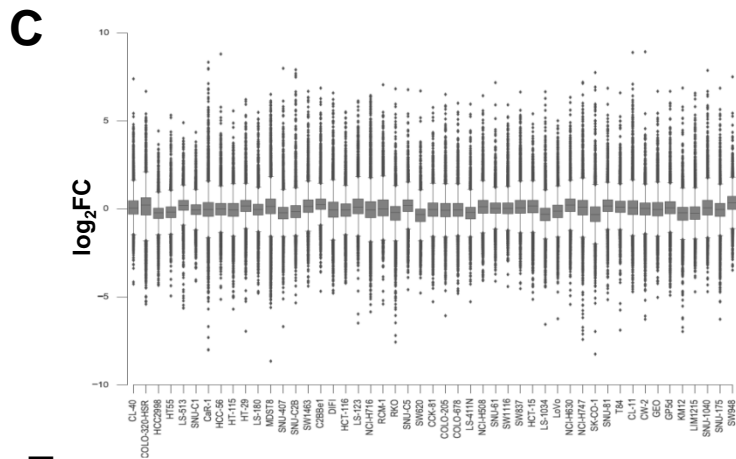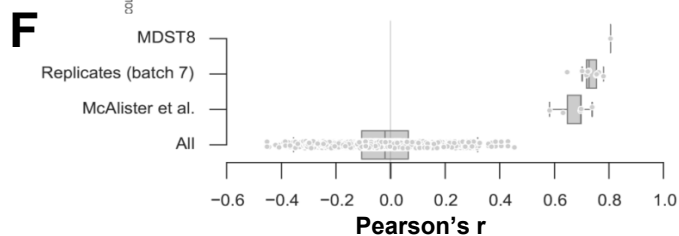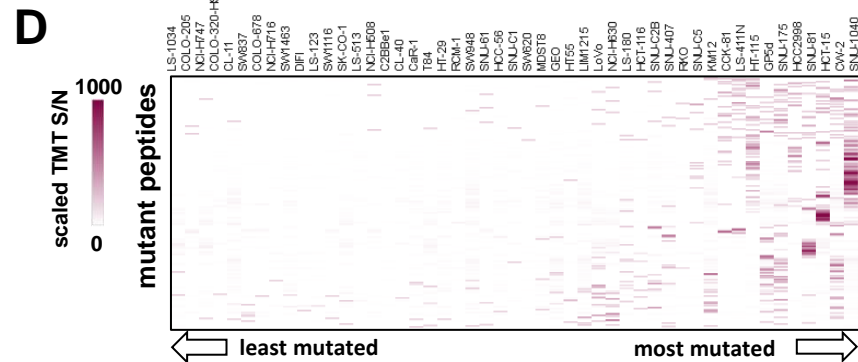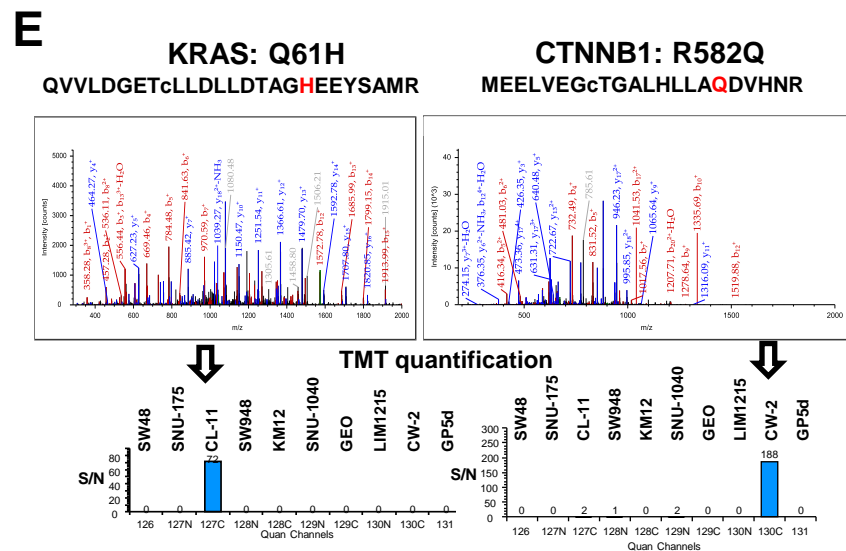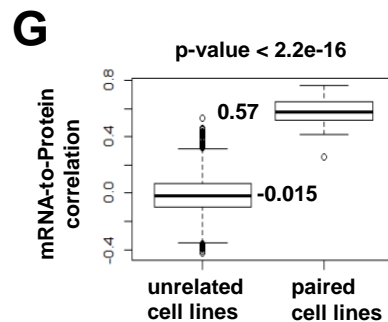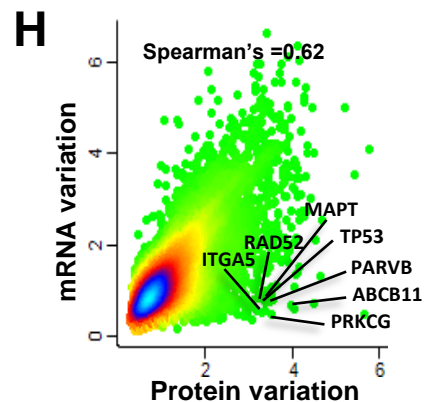

# Figure S2

**A**

**All pairs**

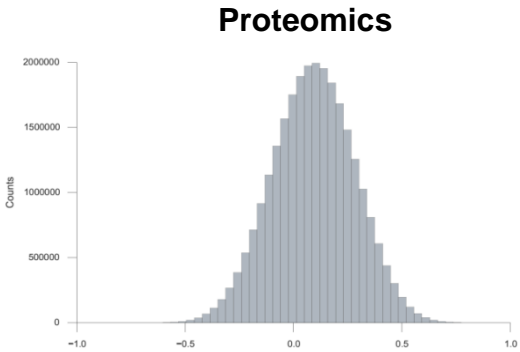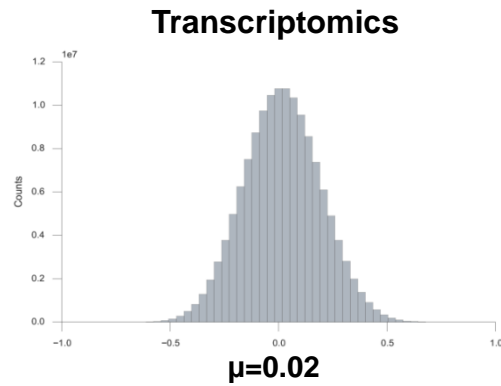

**CORUM**

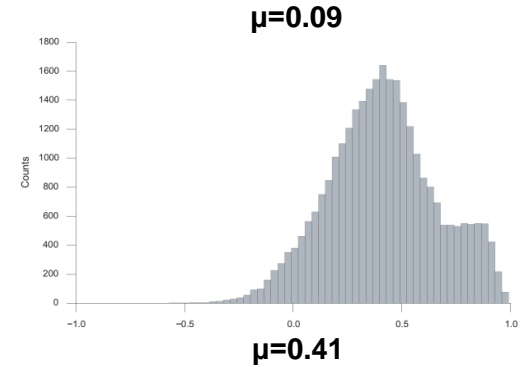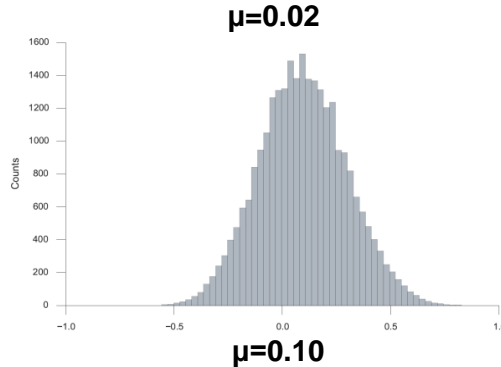

\*Spearman's *r*

**B**

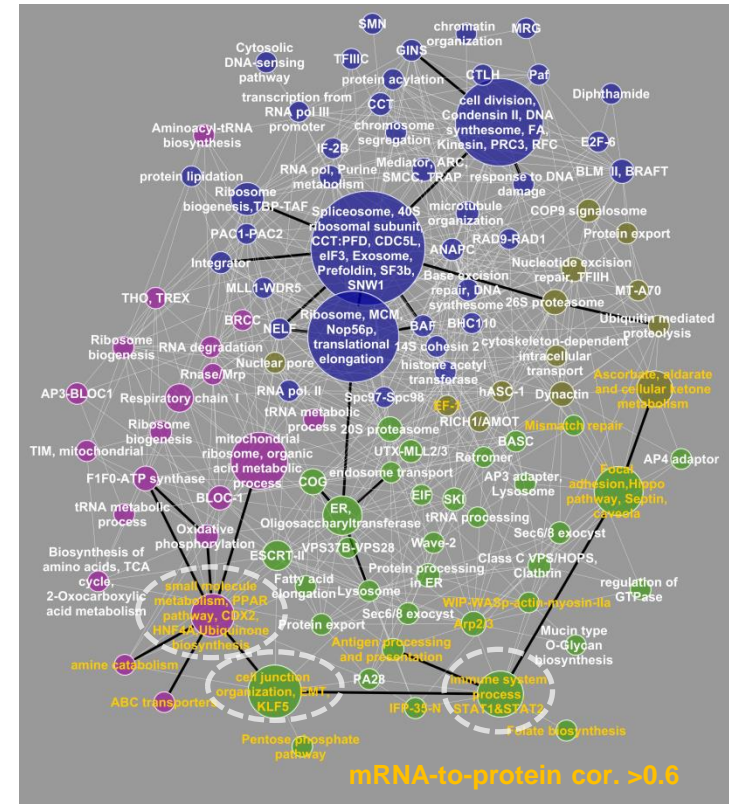

# Figure S3

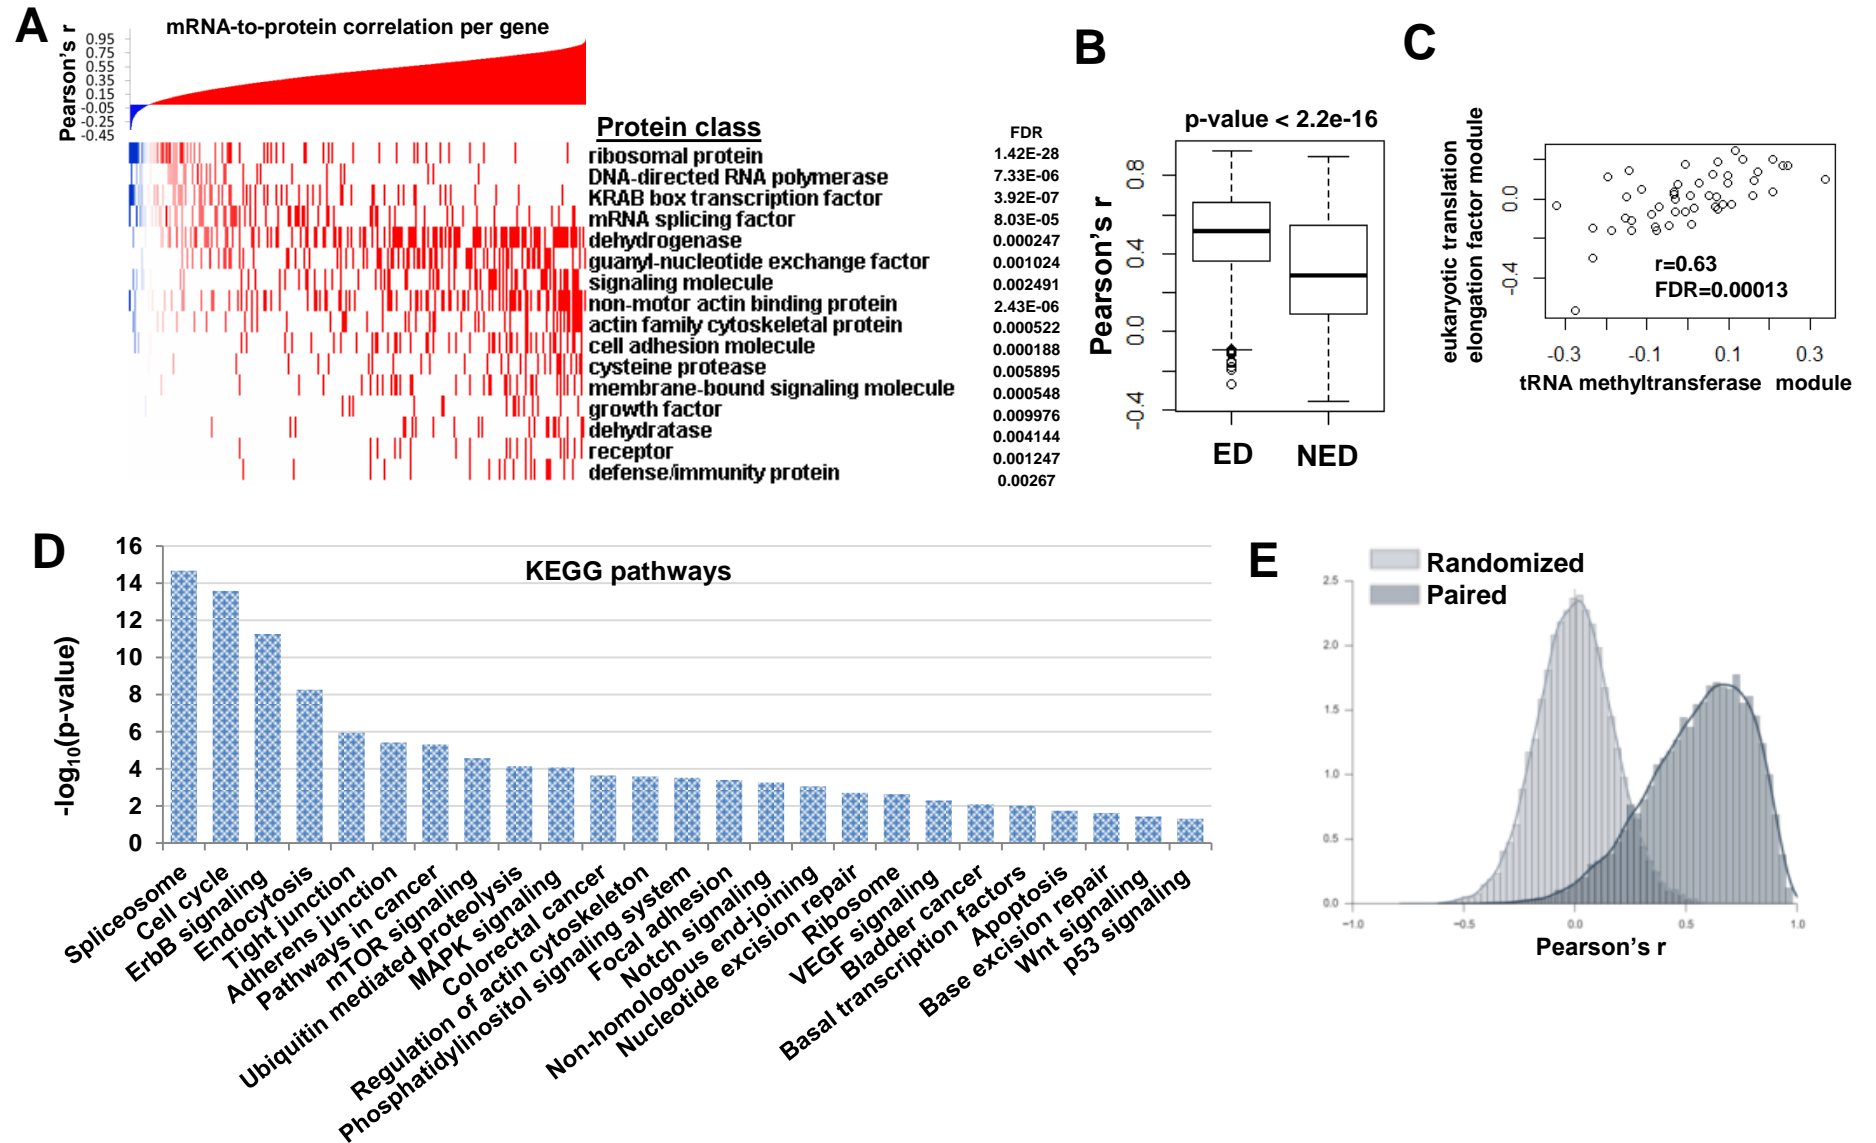

# Figure S4

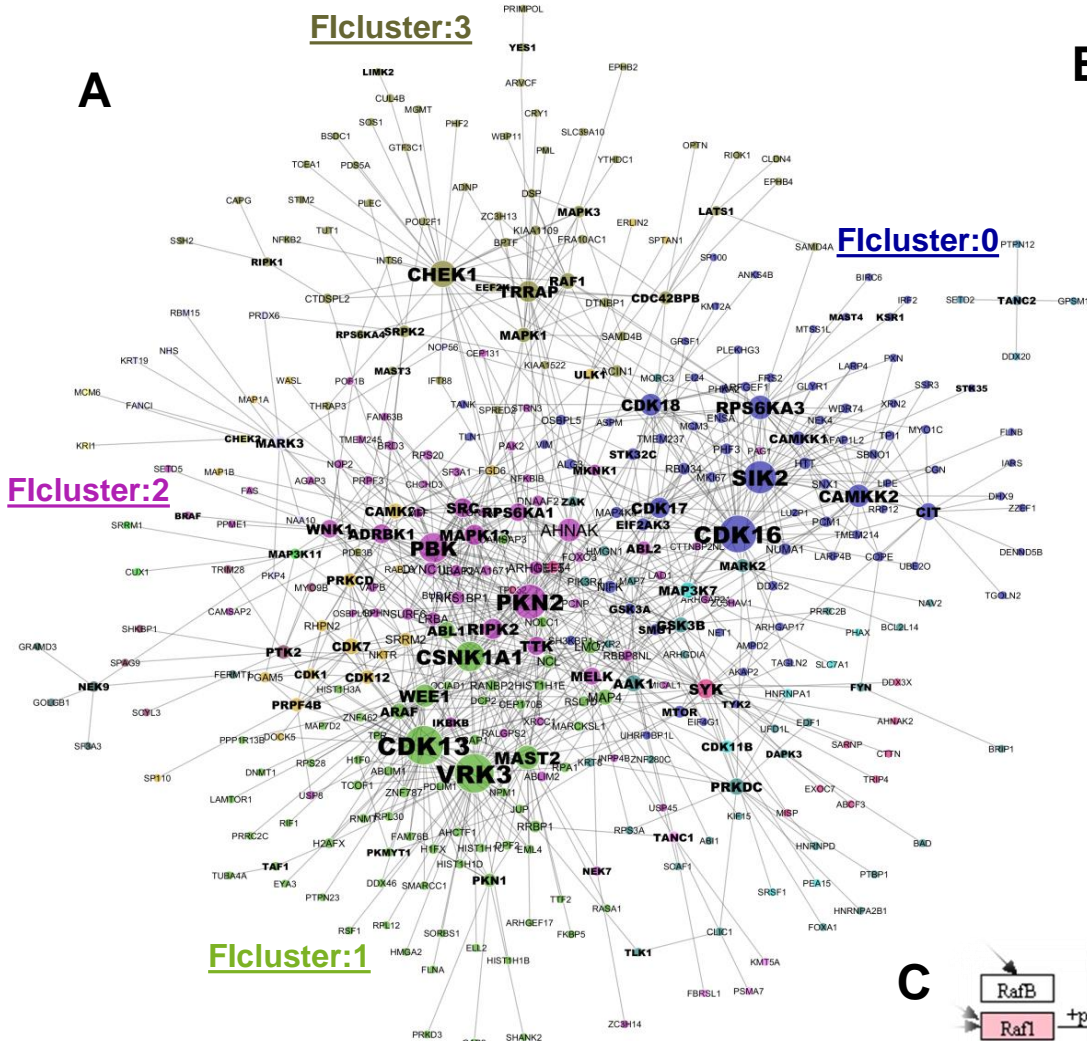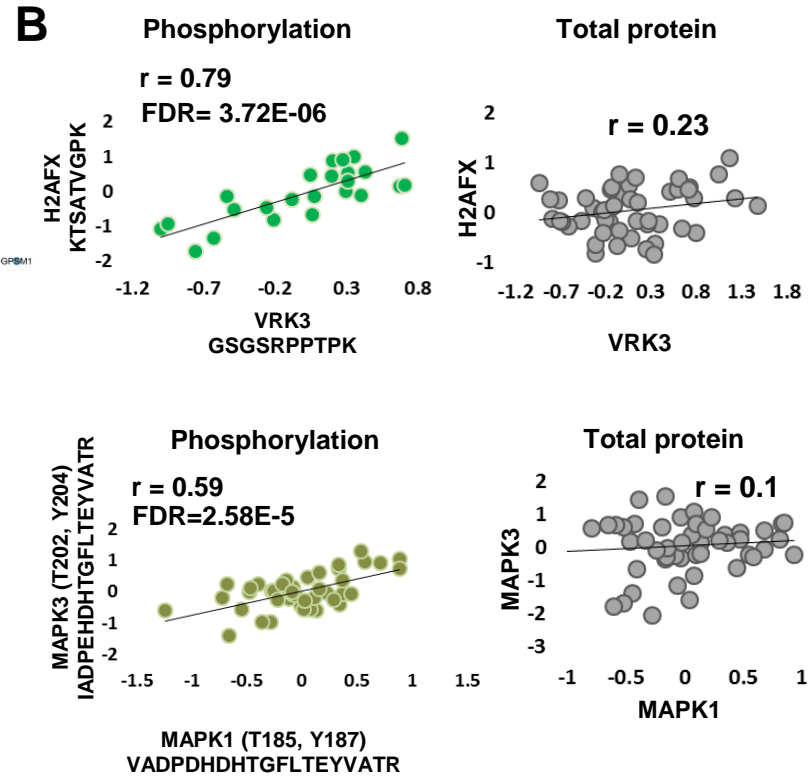

nucleosome assembly:  $FDR=5.09E-08$   
mitosis:  $FDR=0.024$

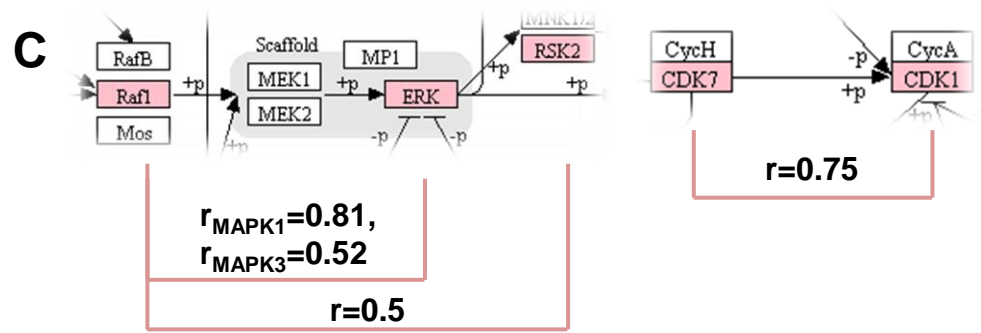



# Figure S5

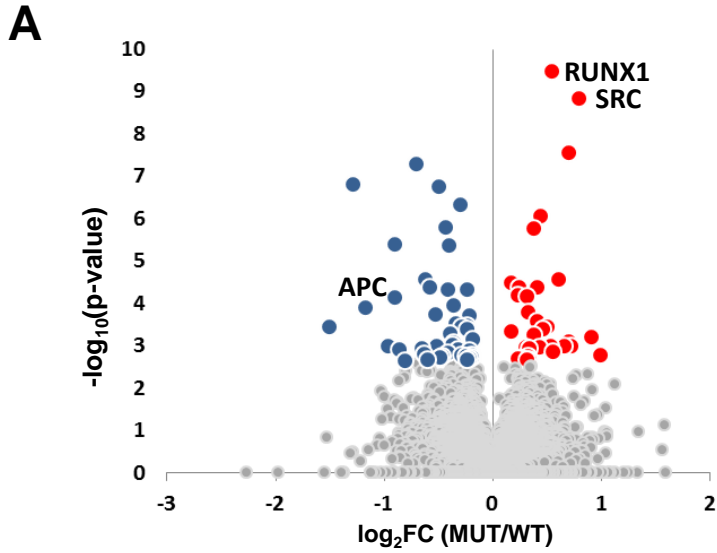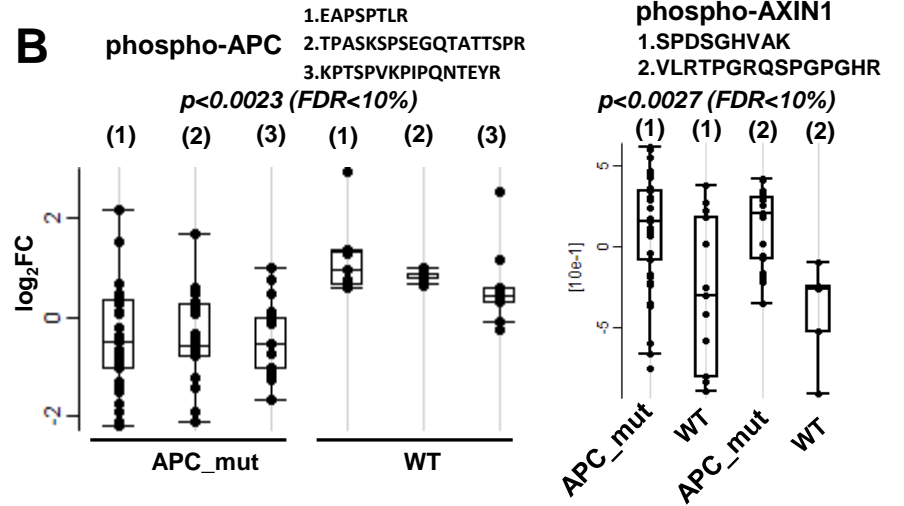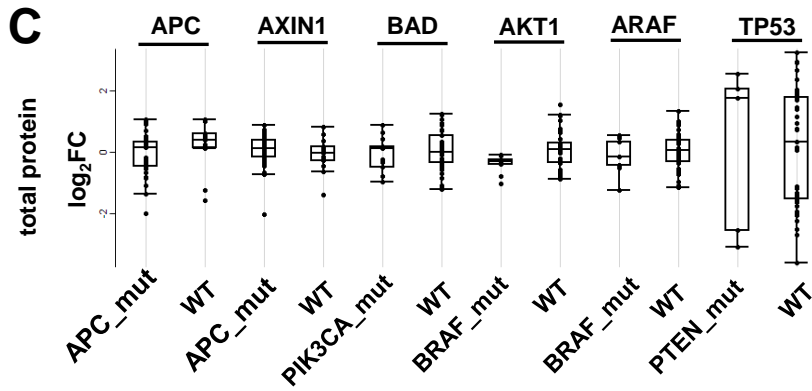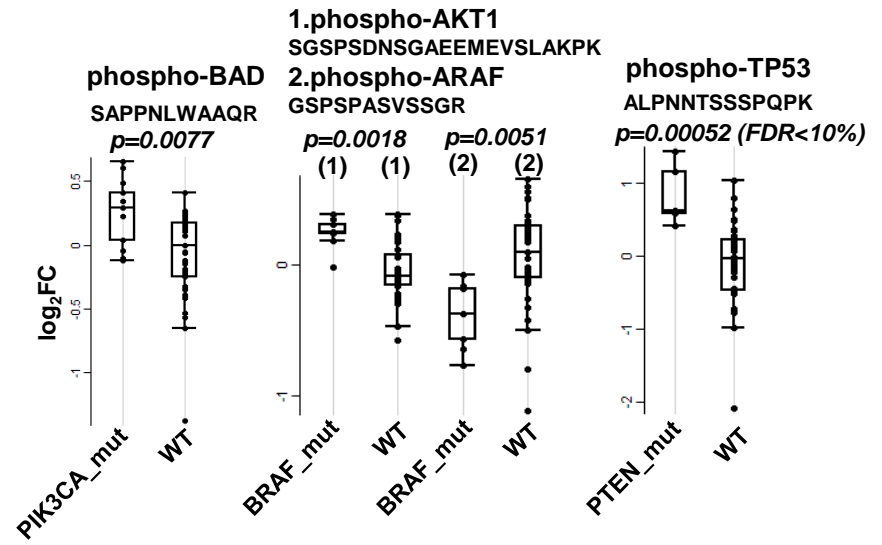

# Figure S6

## A

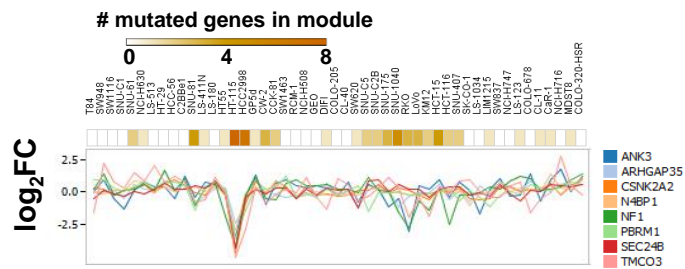

## B

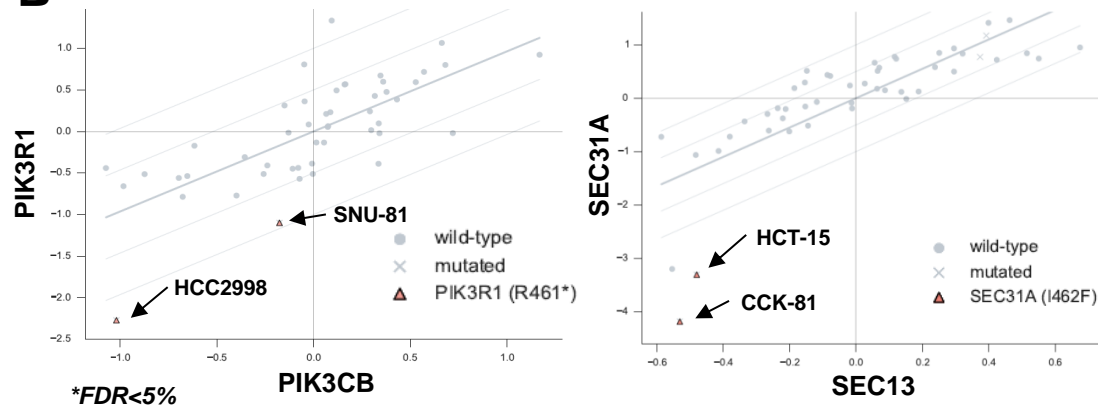

## E

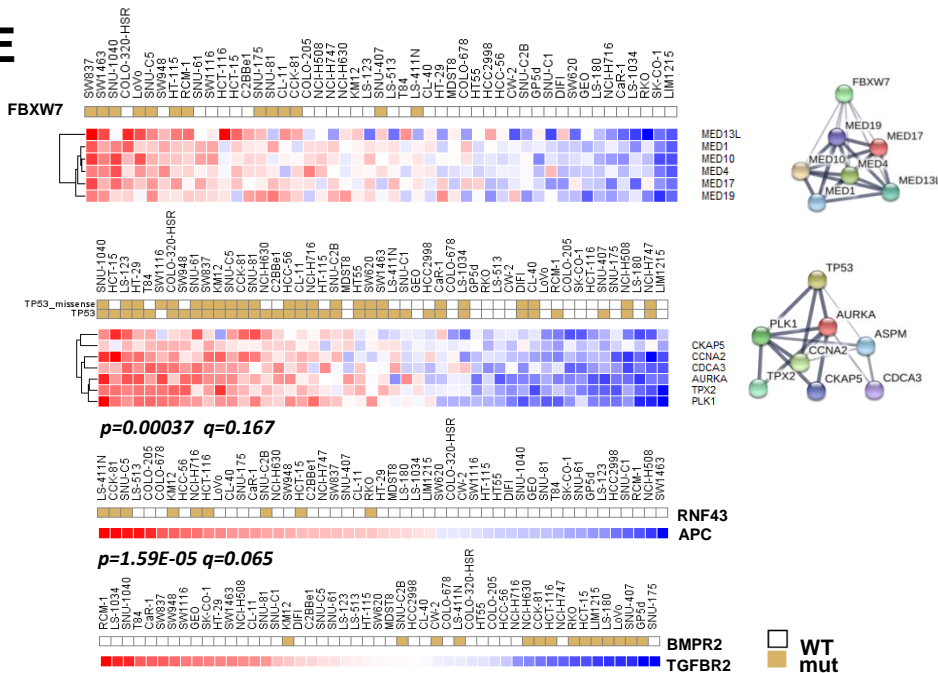

## C

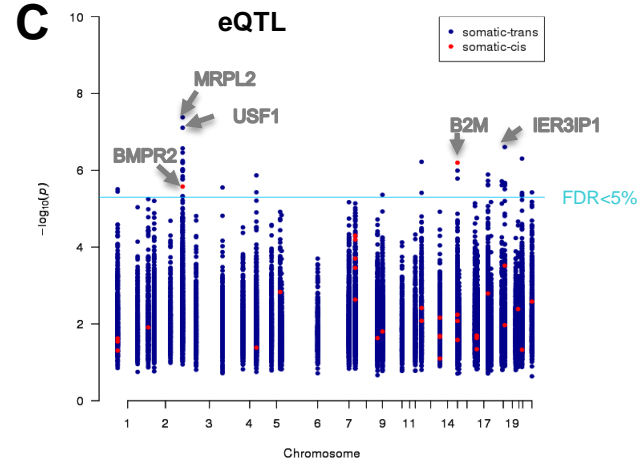

## D

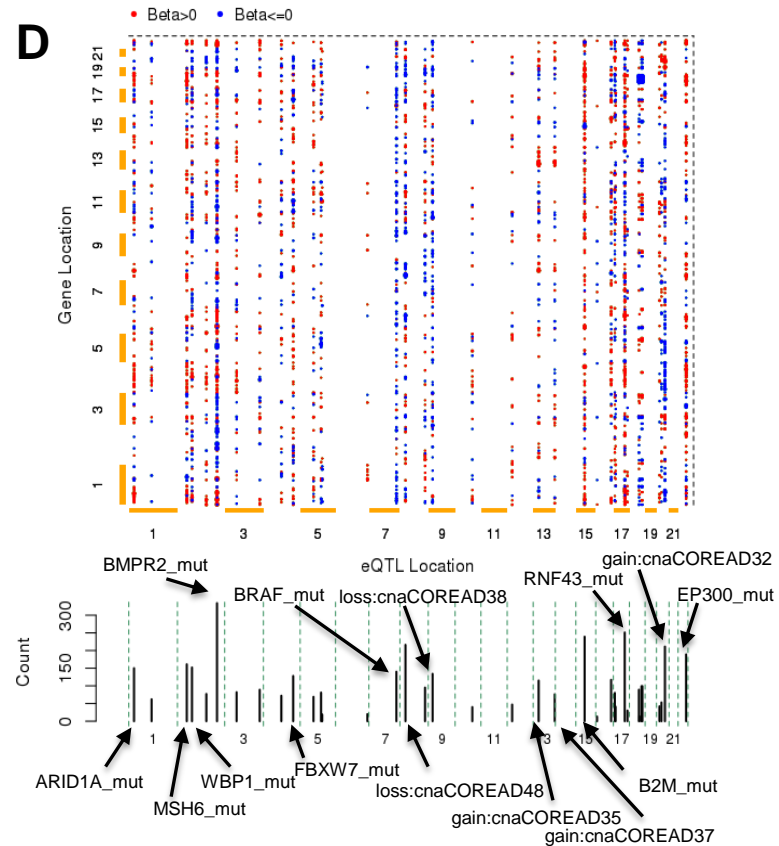

# Figure S7

**A**
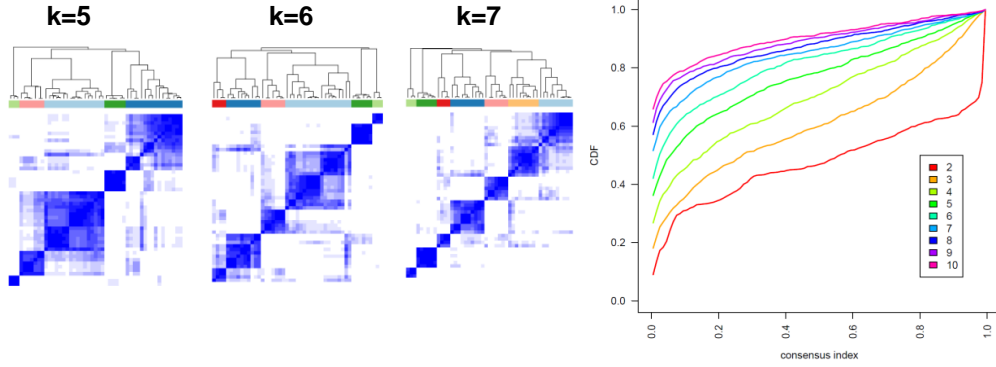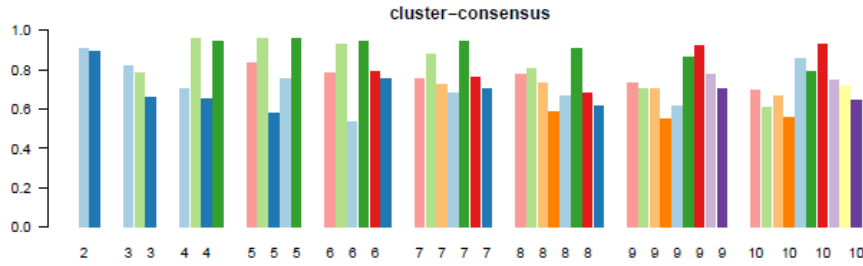
**B**
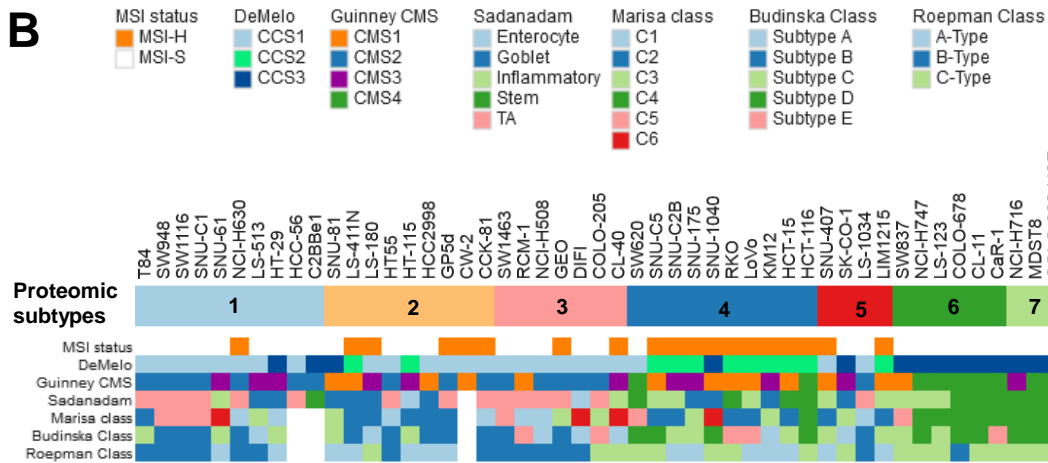
**C**
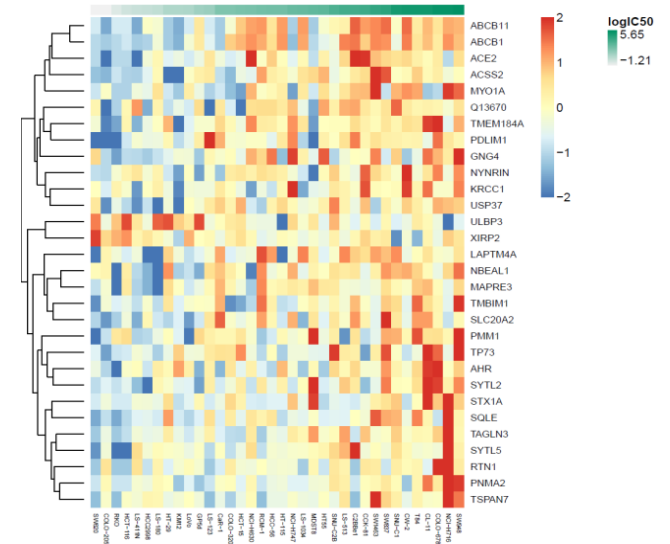
**D**
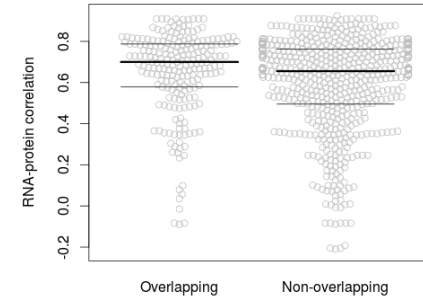
**E**
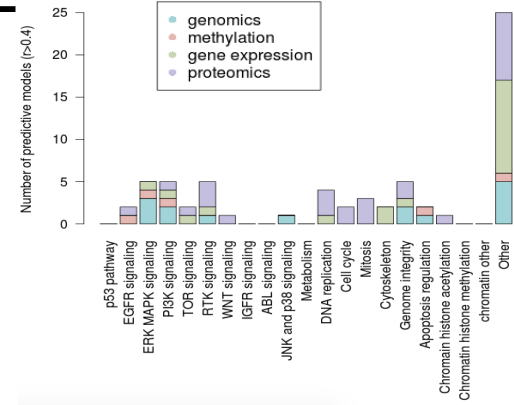

Source: http://biorxiv.org/content/10.1101/092767v1.full.pdf
